# Supplementary material
Source: publisher figshare collection journal article supplement (https://acs.figshare.com/ndownloader/files/4196479)

# Supporting Information

## Thio-Claisen Rearrangement Used in Preparing Anti- $\beta$ -Functionalized $\gamma,\delta$ -Unsaturated Amino Acids: Scope and Limitations

Zhihua Liu,<sup>†</sup> Sukeshi J. Mehta,<sup>†</sup> Kwang-Soo Lee,<sup>†</sup> Bryan Grossman,<sup>†</sup> Hongchang Qu,<sup>†</sup> Xuyuan Gu,<sup>‡</sup> Gary S. Nichol,<sup>†</sup> Victor J. Hruby\*<sup>†</sup>

<sup>†</sup>*Department of Chemistry and Biochemistry, University of Arizona, 1306 E. University Blvd., Tucson, AZ 85721, and* <sup>‡</sup>*Small molecule pharmaceuticals, Nektar Therapeutics, 490 Discovery Dr., Huntsville, AL 35758*

*Email: hruby@u.arizona.edu*

### Contents

General Information-----S2

<sup>1</sup>H and <sup>13</sup>C spectra-----S3

**General Information:** All starting materials and reagents were used as received without further purification unless otherwise noted. Dried THF was obtained from distillation over sodium and benzophenone. Dried DCM was obtained from distillation over Calcium hydride. Dried MeCN was used as received. NMR spectra were acquired on 500 MHz or 600 MHz spectrometers; CDCl<sub>3</sub> or TMS is used as internal standard for reporting chemical shift values. Data are presented as follows: chemical shift (ppm), multiplicity (*s* = singlet, *d* = doublet, *t* = triplet, *m* = multiplet, *br* = broad), coupling constant *J* (Hz) and integration. IR spectra were recorded using NaCl plates. Flash column chromatography was performed using silica gel 60 as the packing material, and pressurized by common compressed air. Analytical thin-layer chromatography (TLC) was performed on glass gel plates (0.25 mm) precoated with a fluorescent indicator. Plates were visualized by UV or KMnO<sub>4</sub> stain. High-performance liquid chromatography (HPLC) analyses were performed a chiral column. Optical rotations were recorded on a digital polarimeter and reported as follows:  $[\alpha]_D^{20}$  (concentration in g/100 mL solvent).

The  $^1\text{H}$  and  $^{13}\text{C}$  NMR spectra for new compounds.

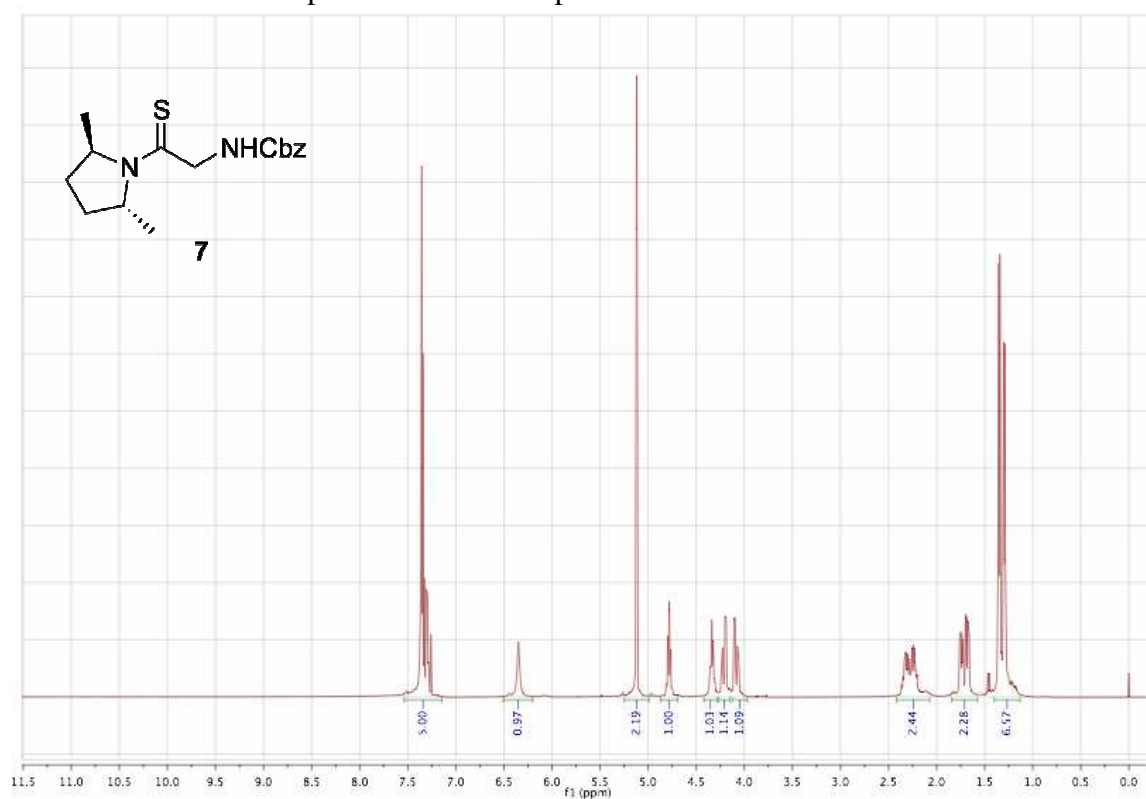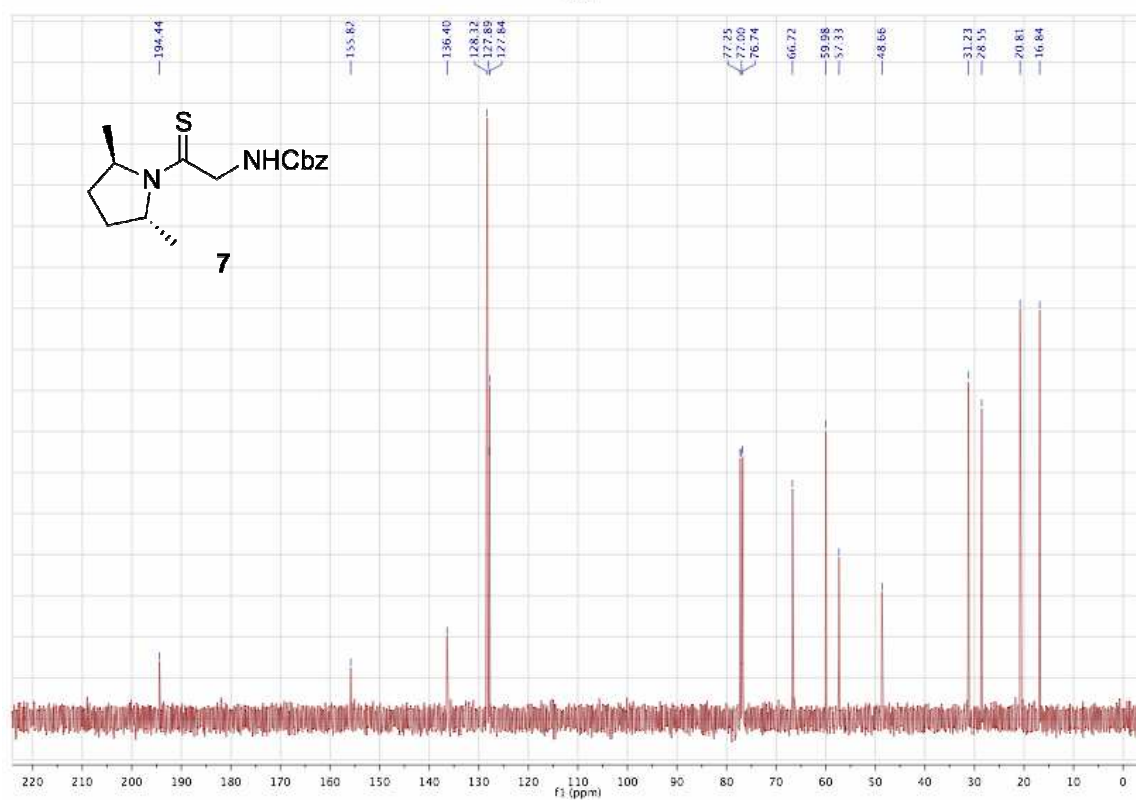

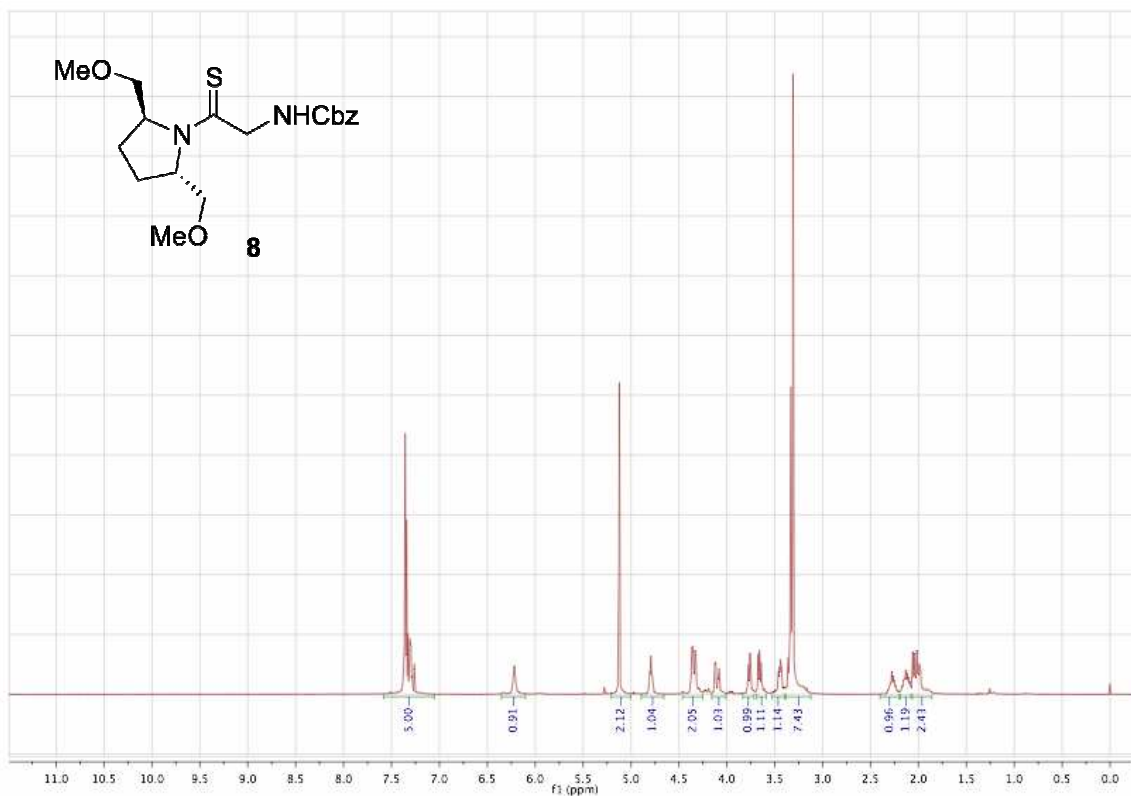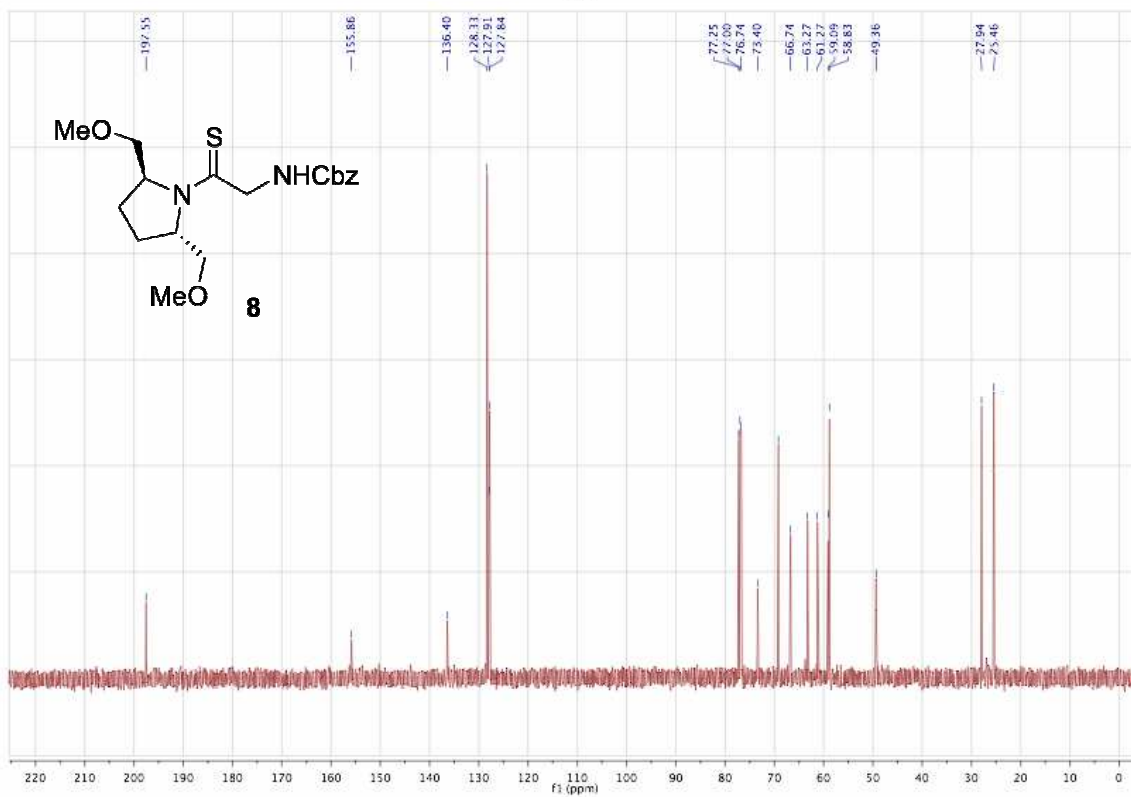

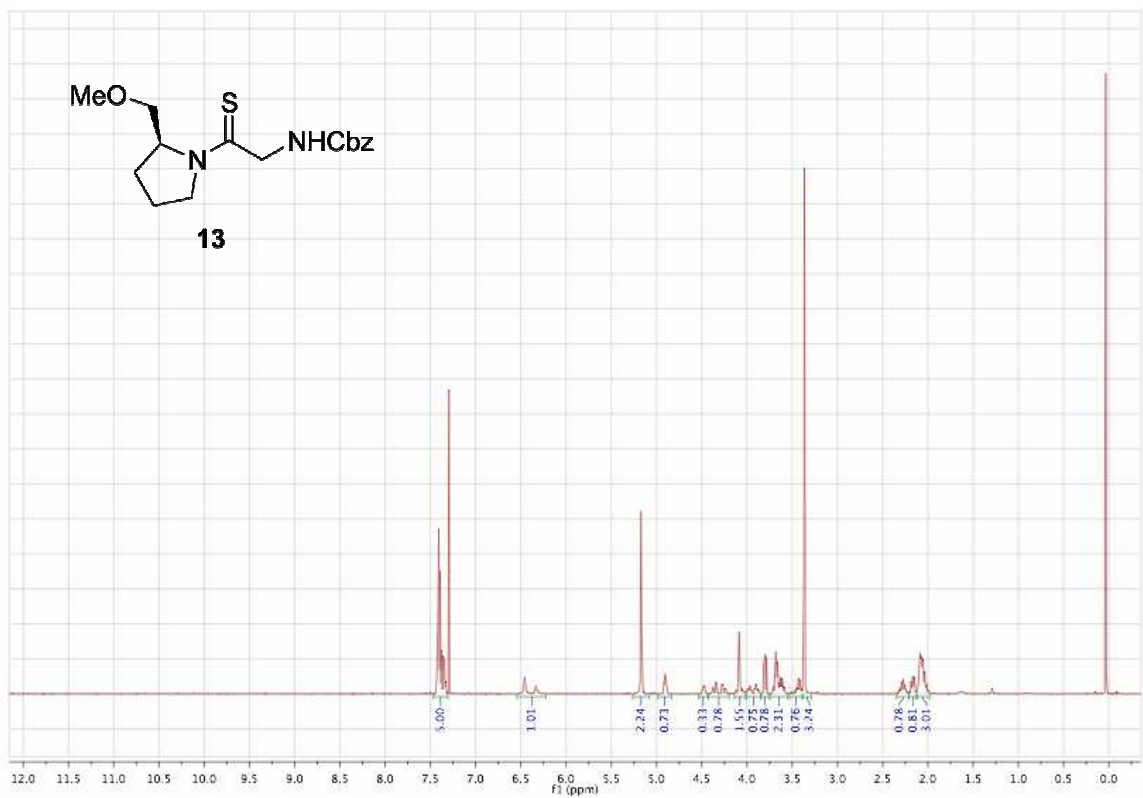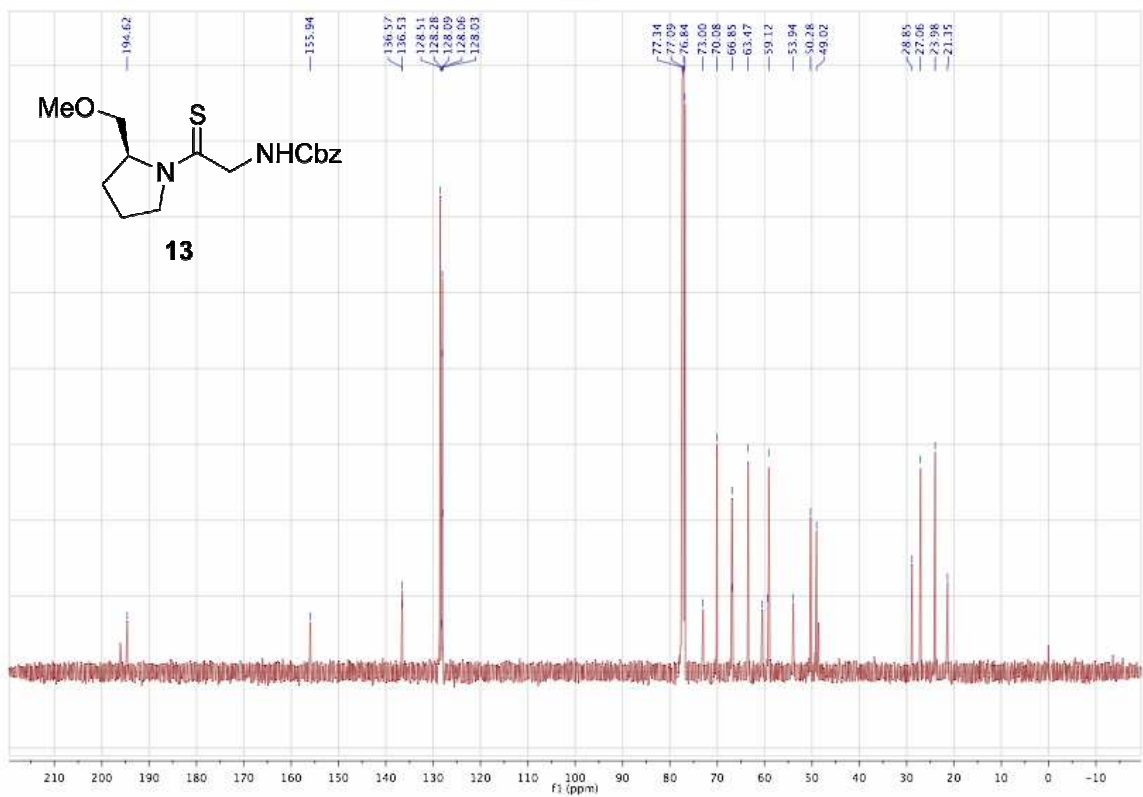

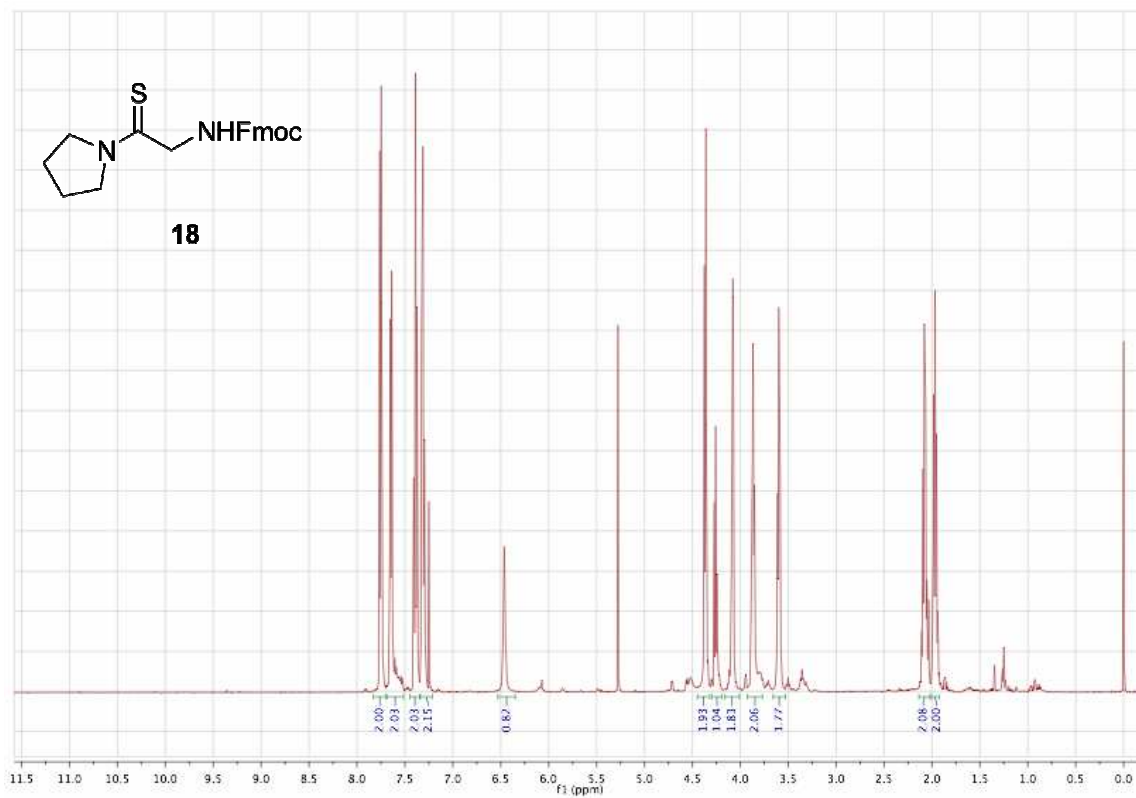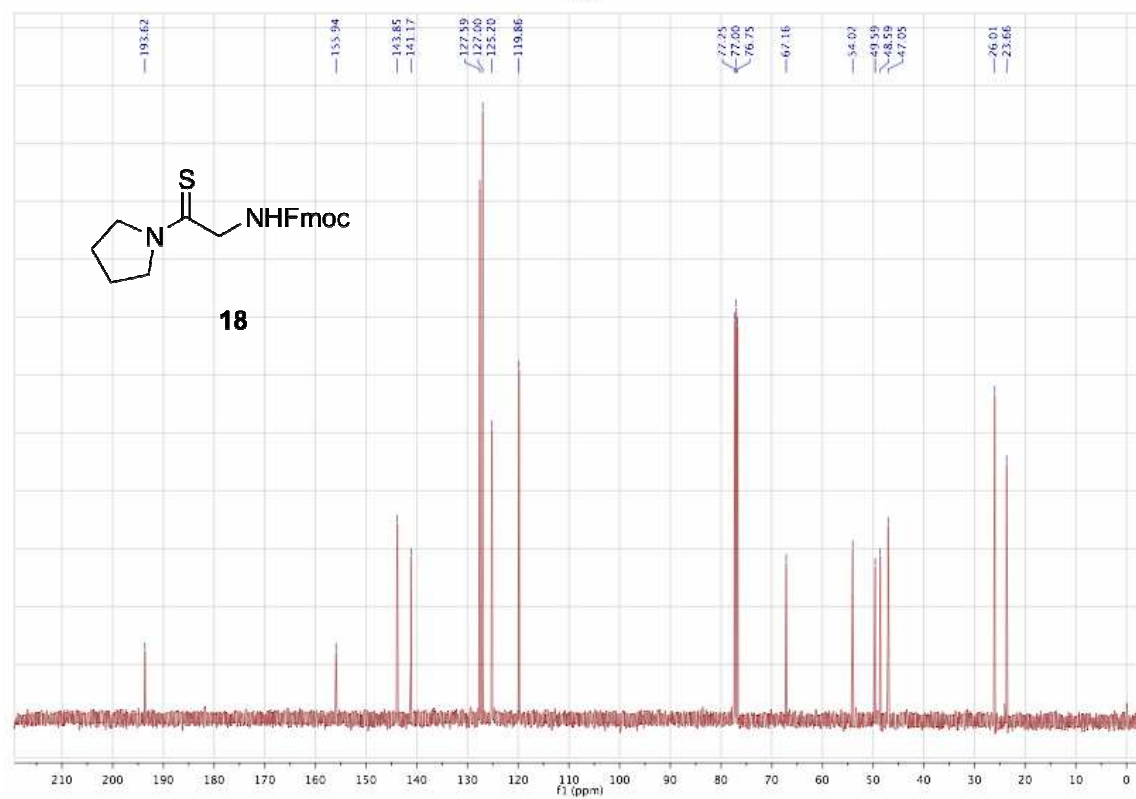

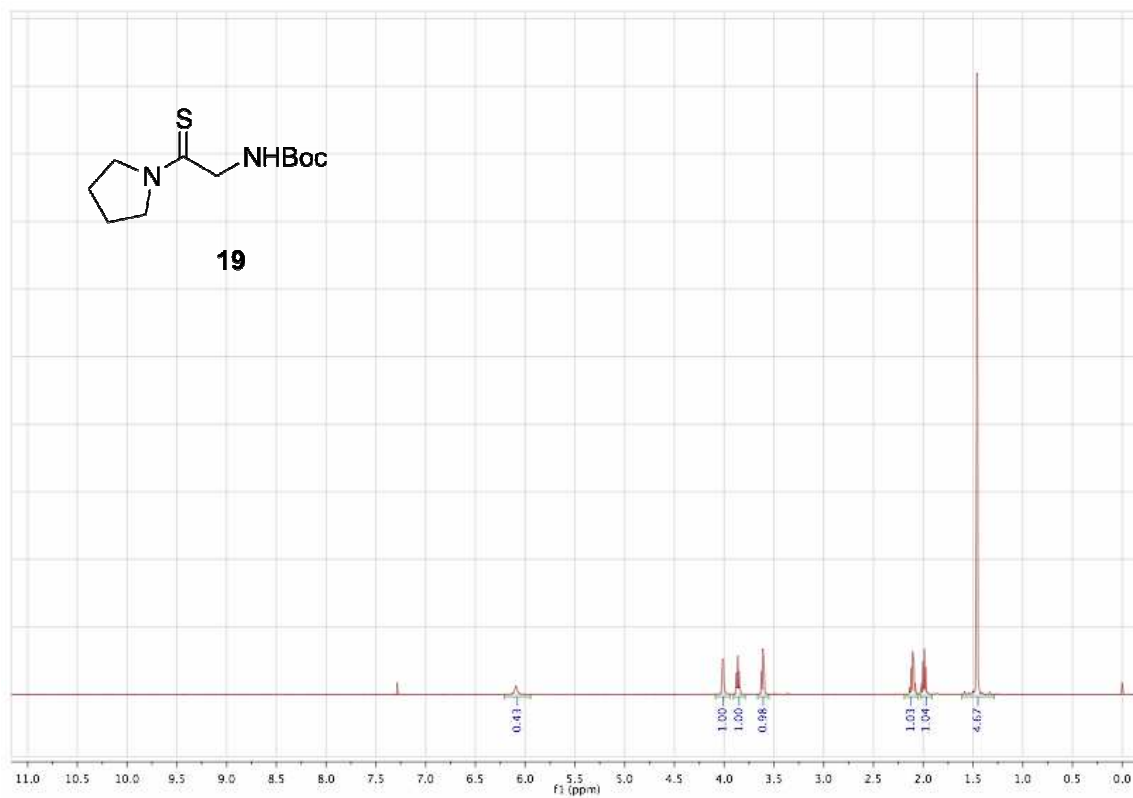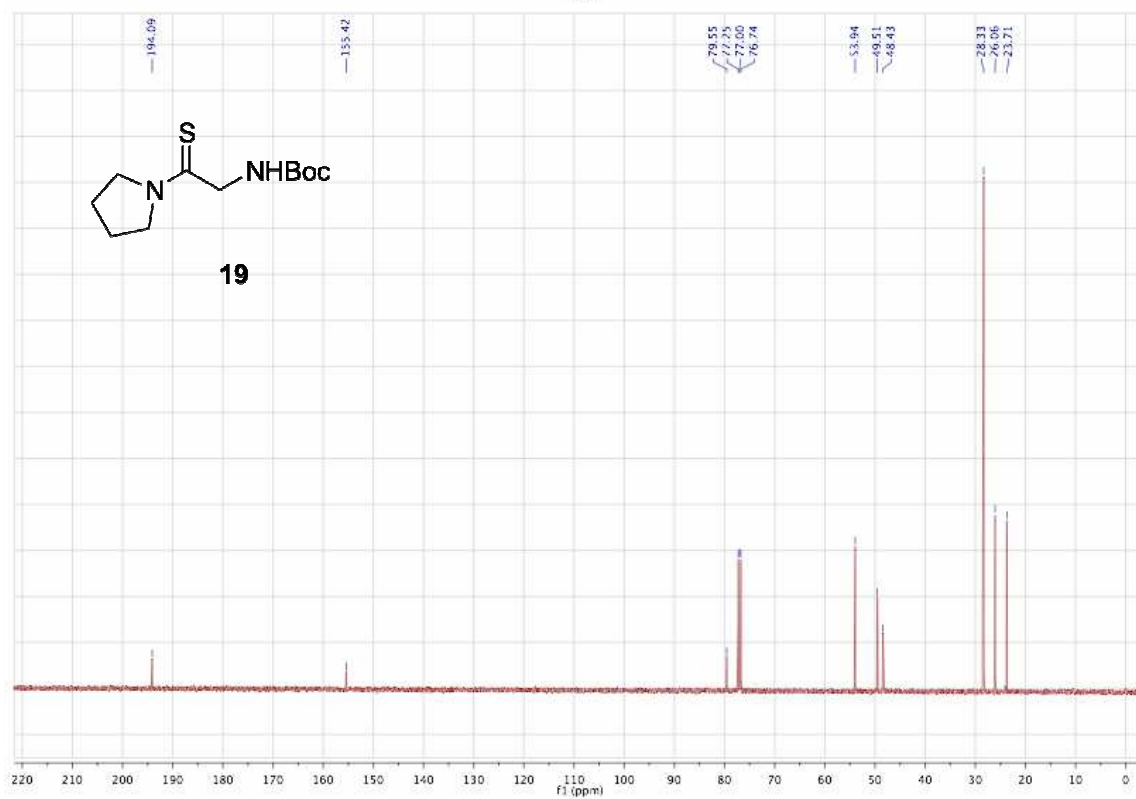

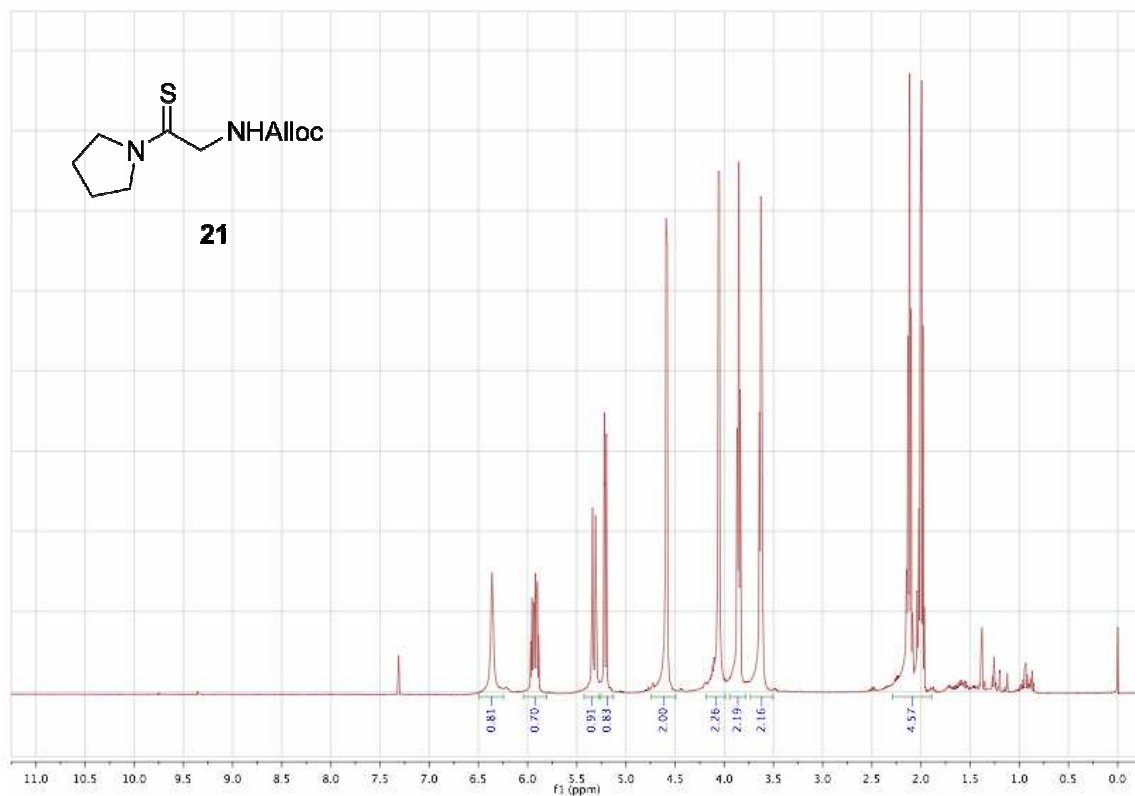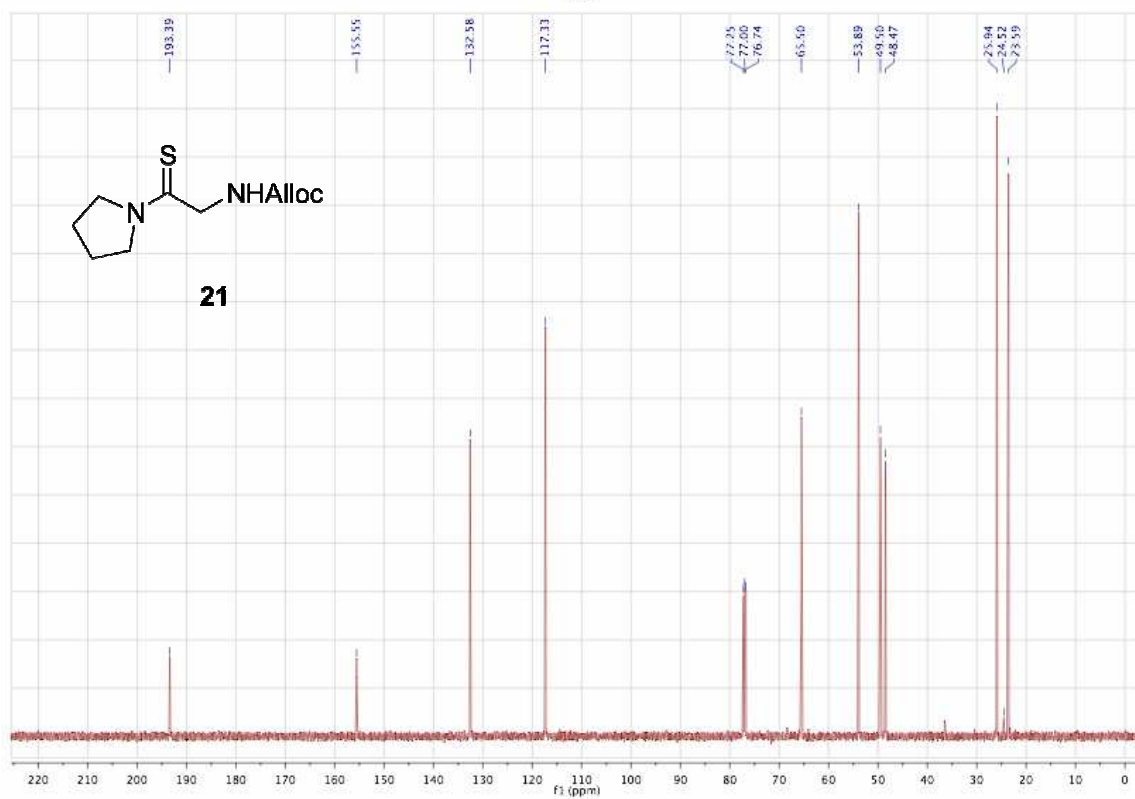



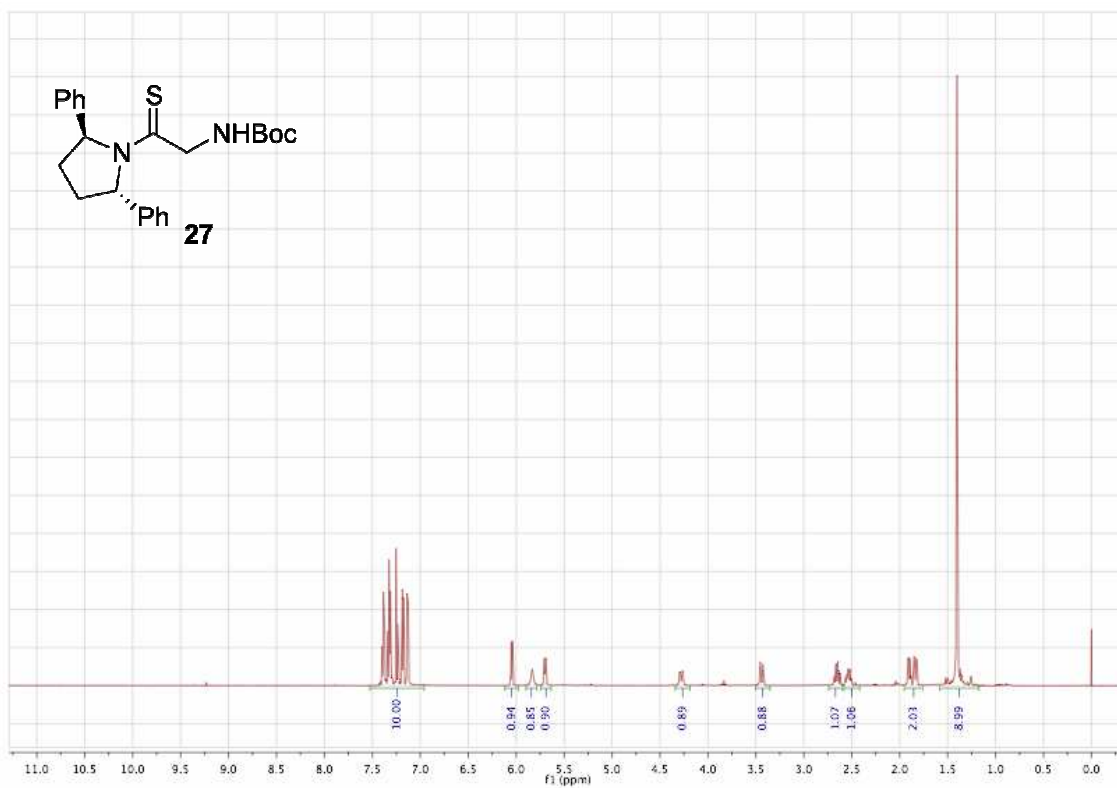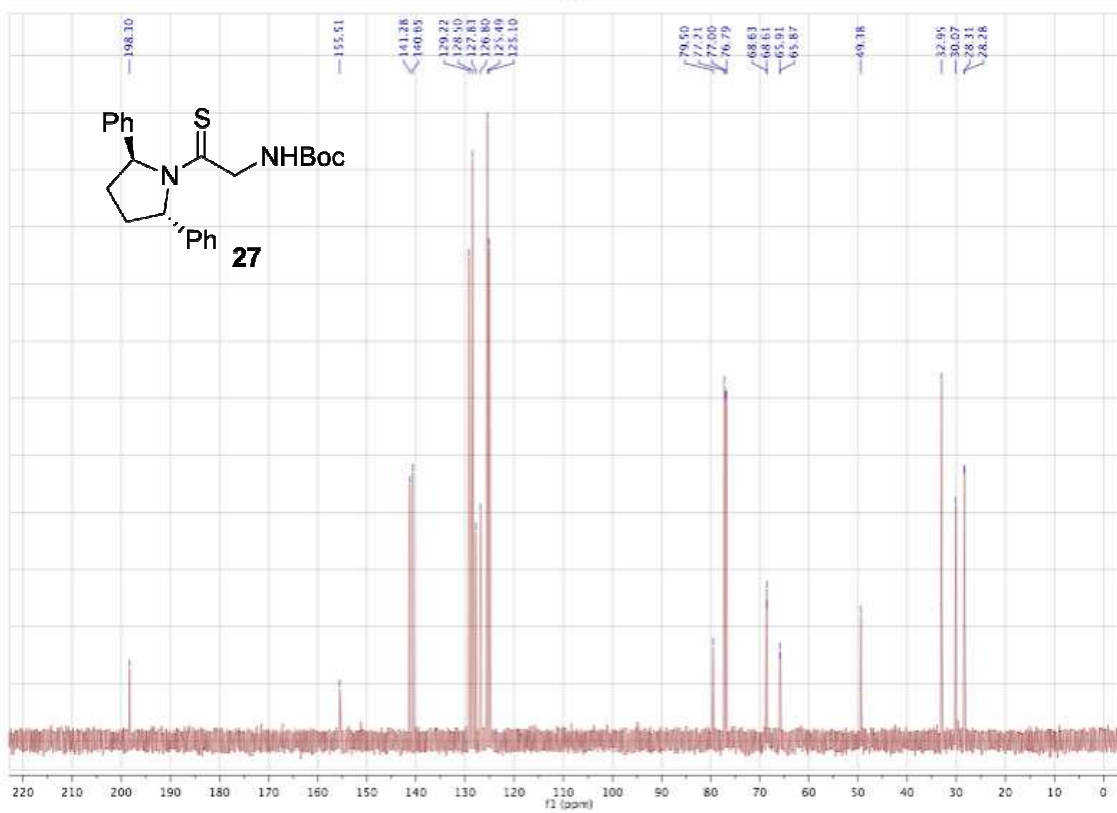

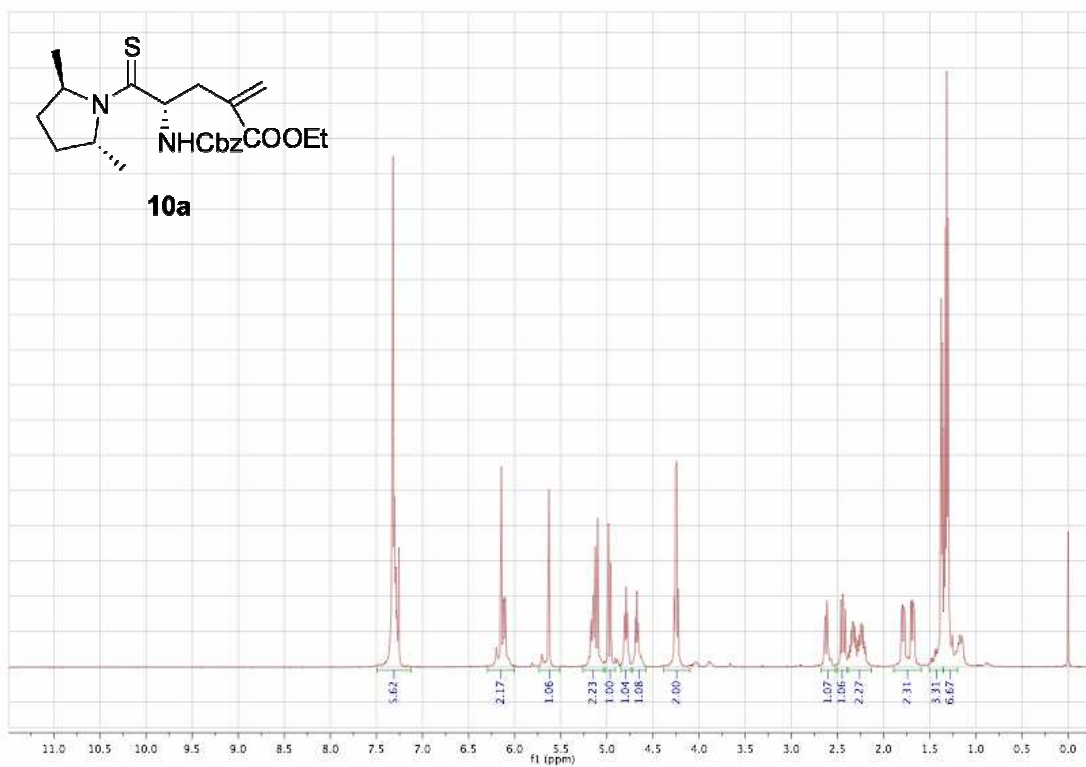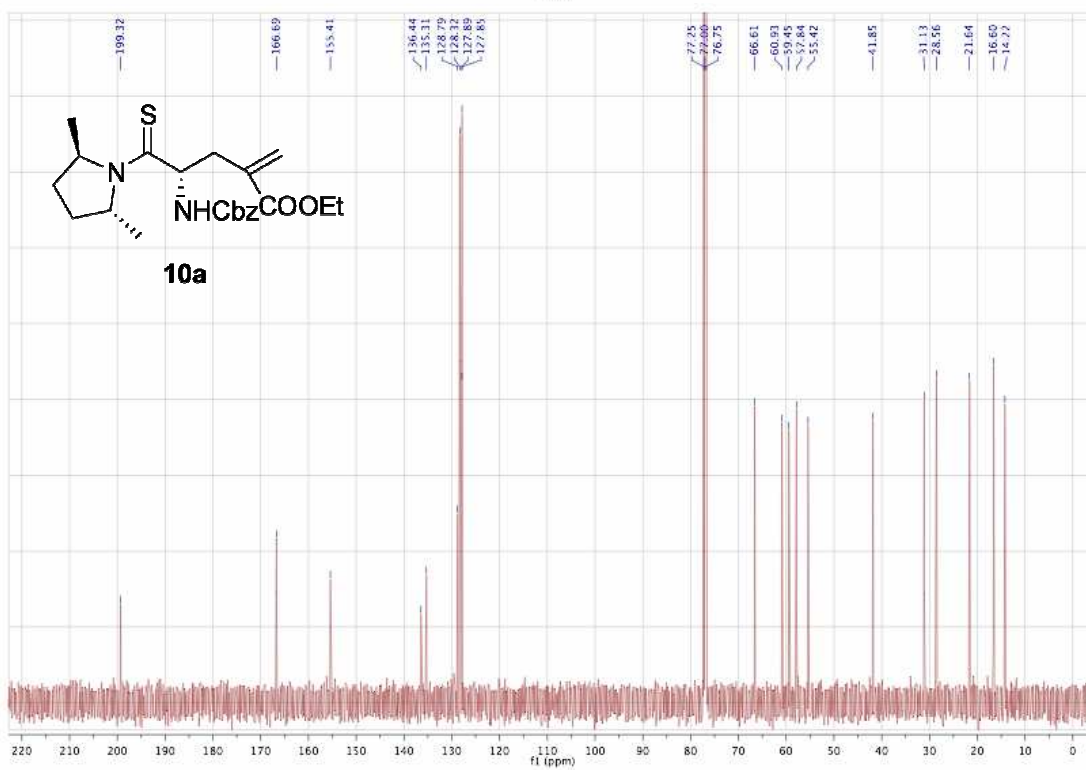

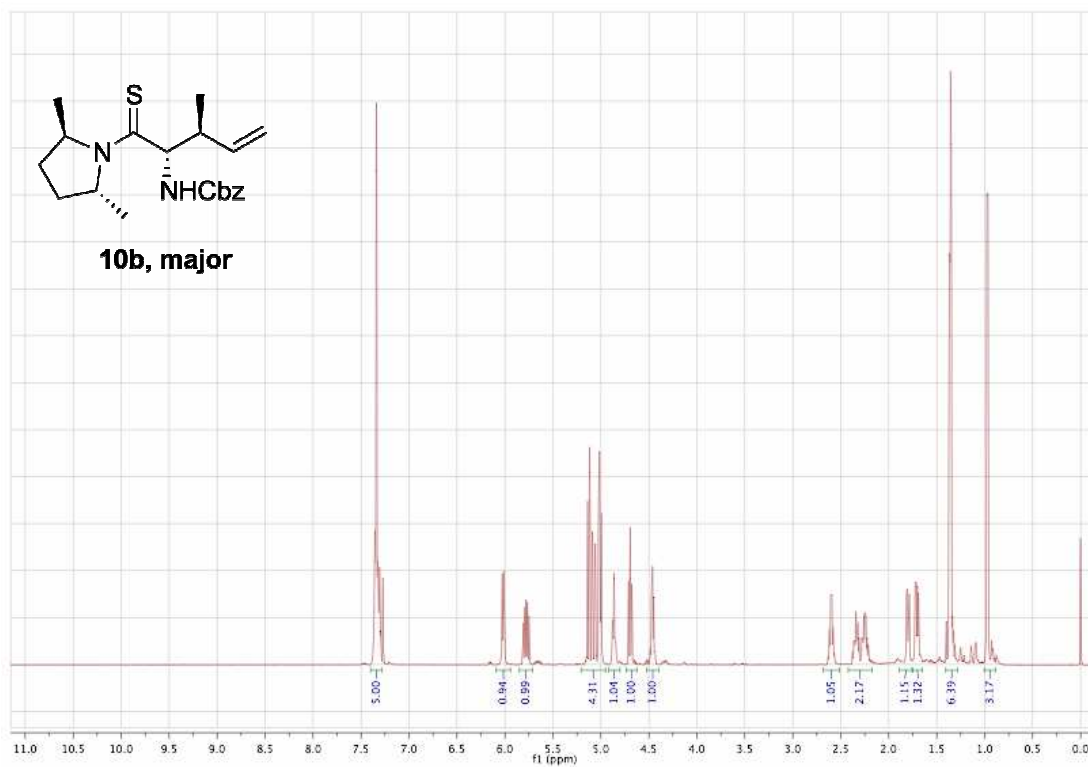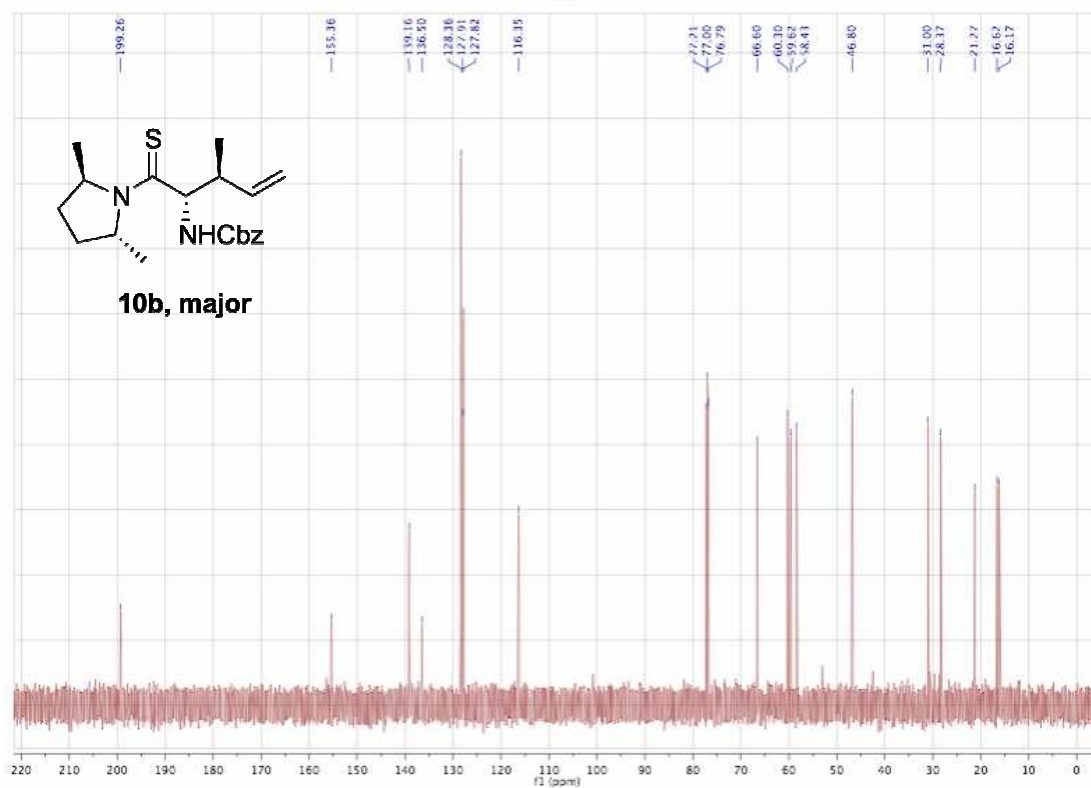

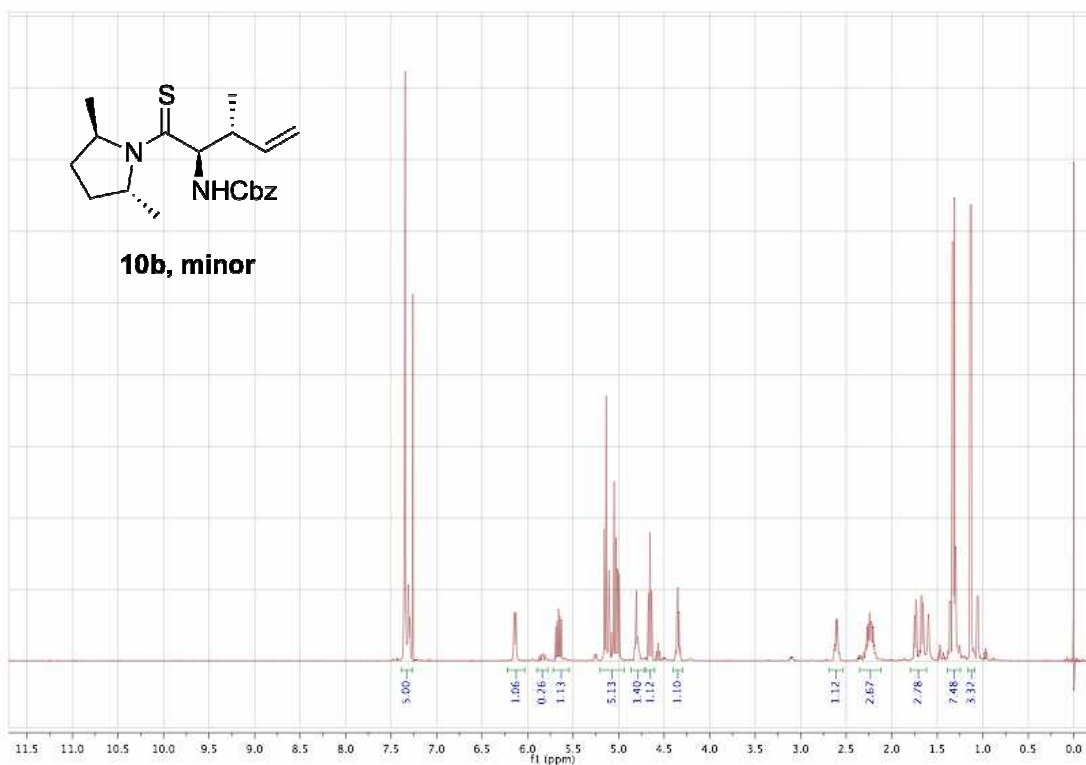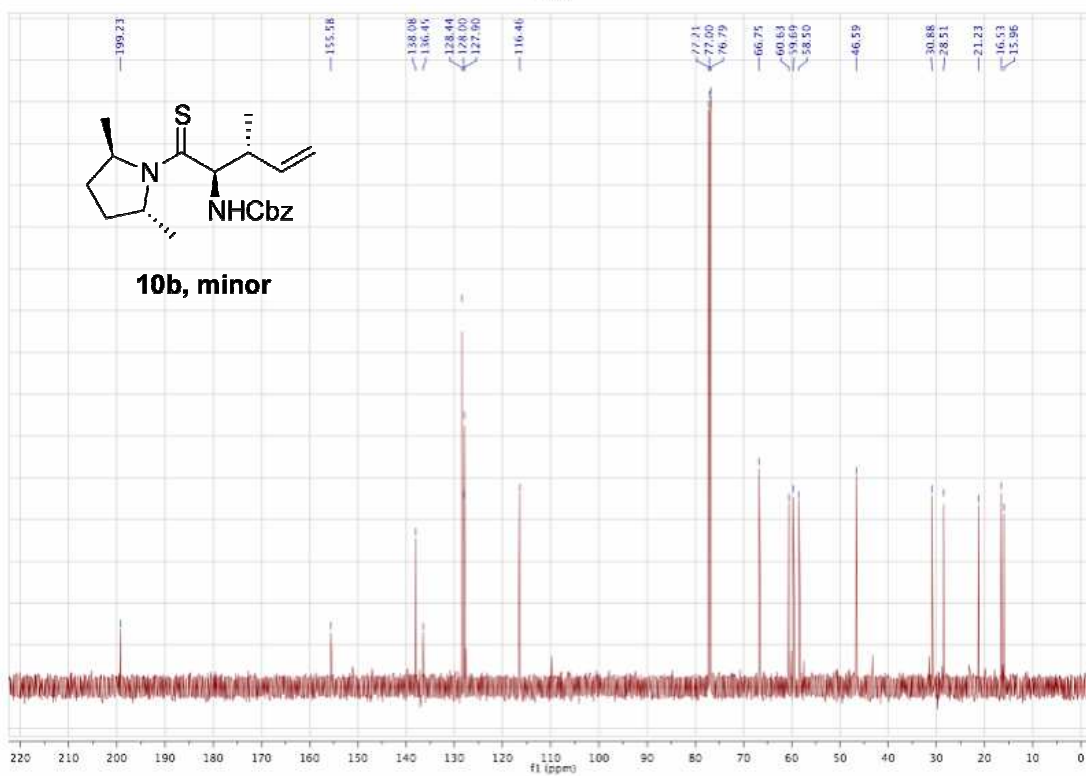

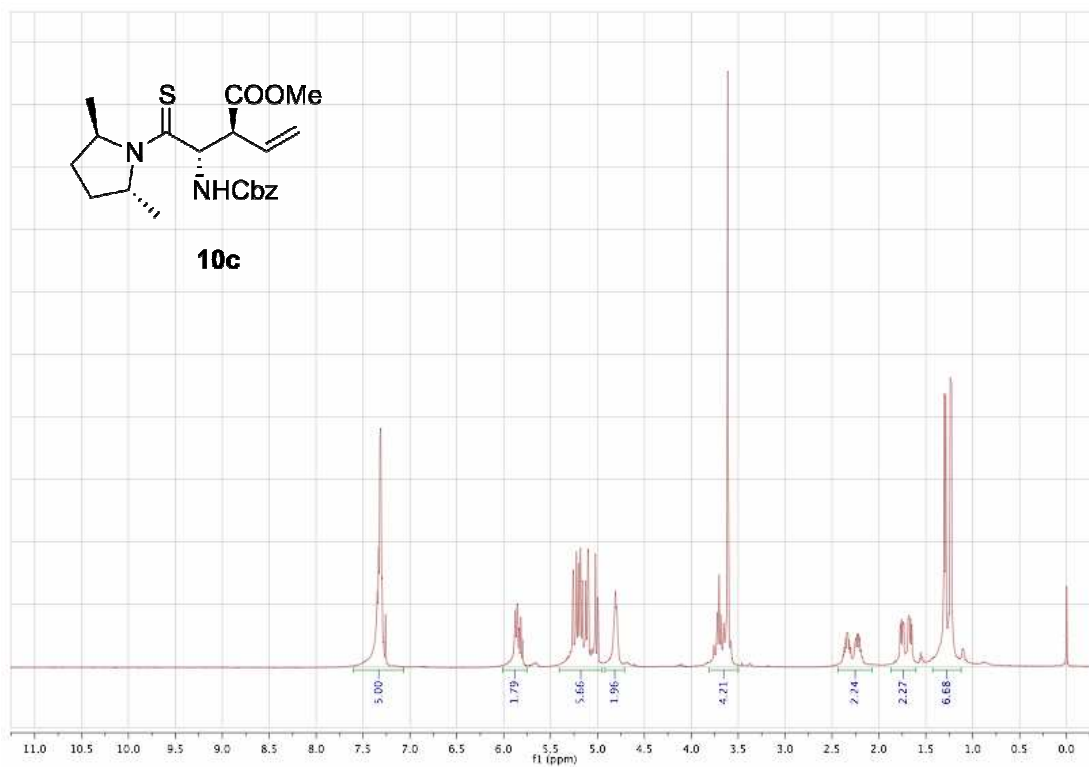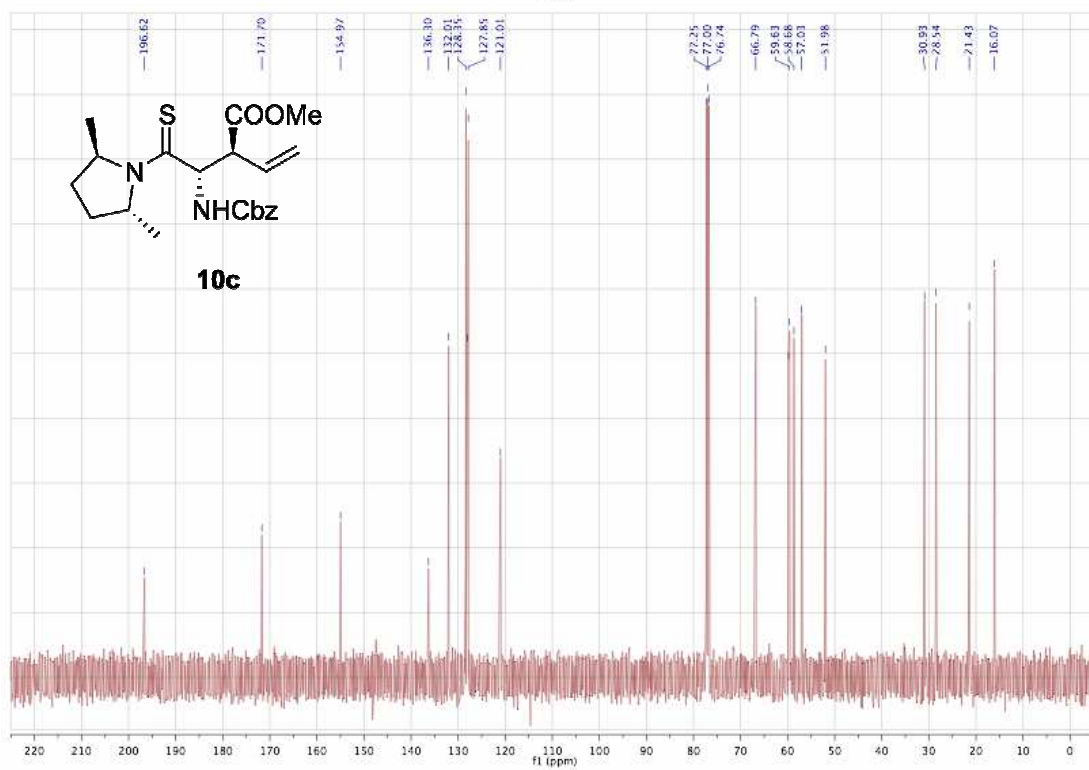

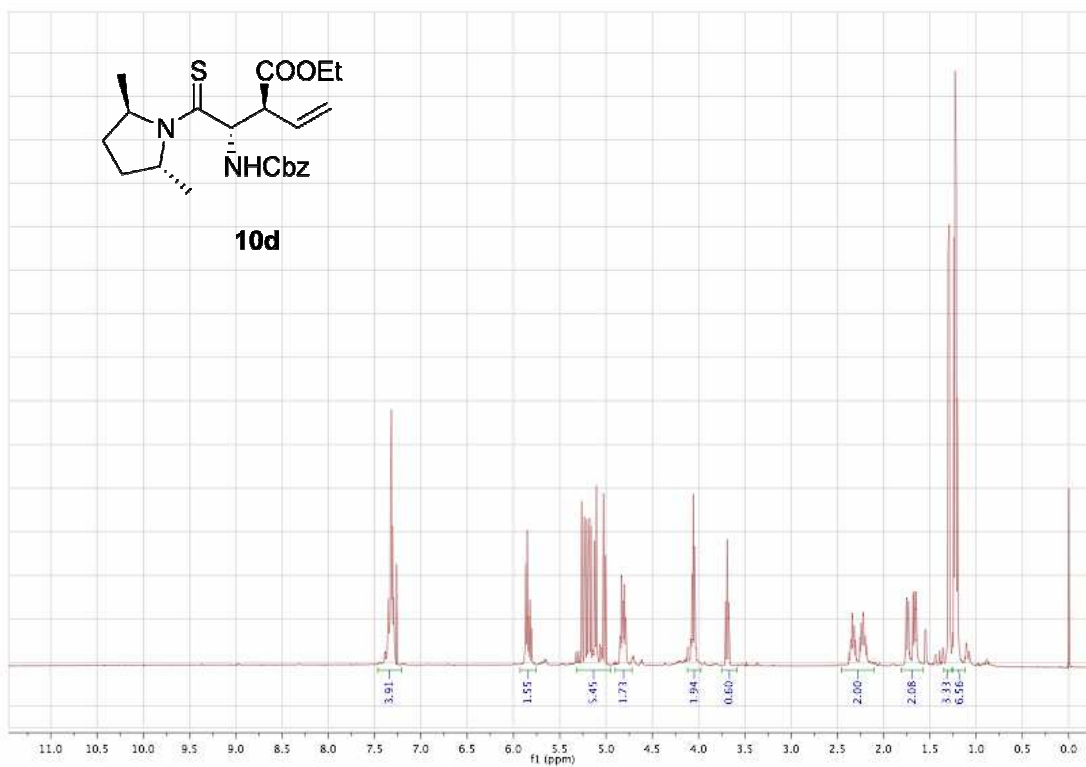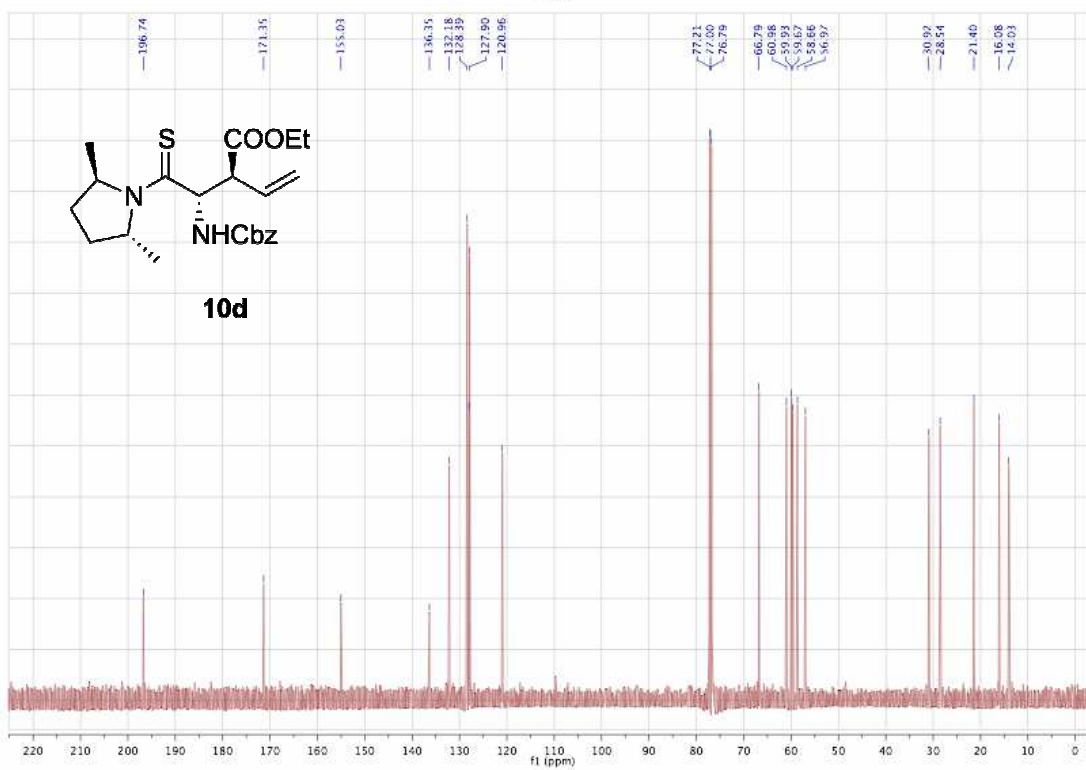

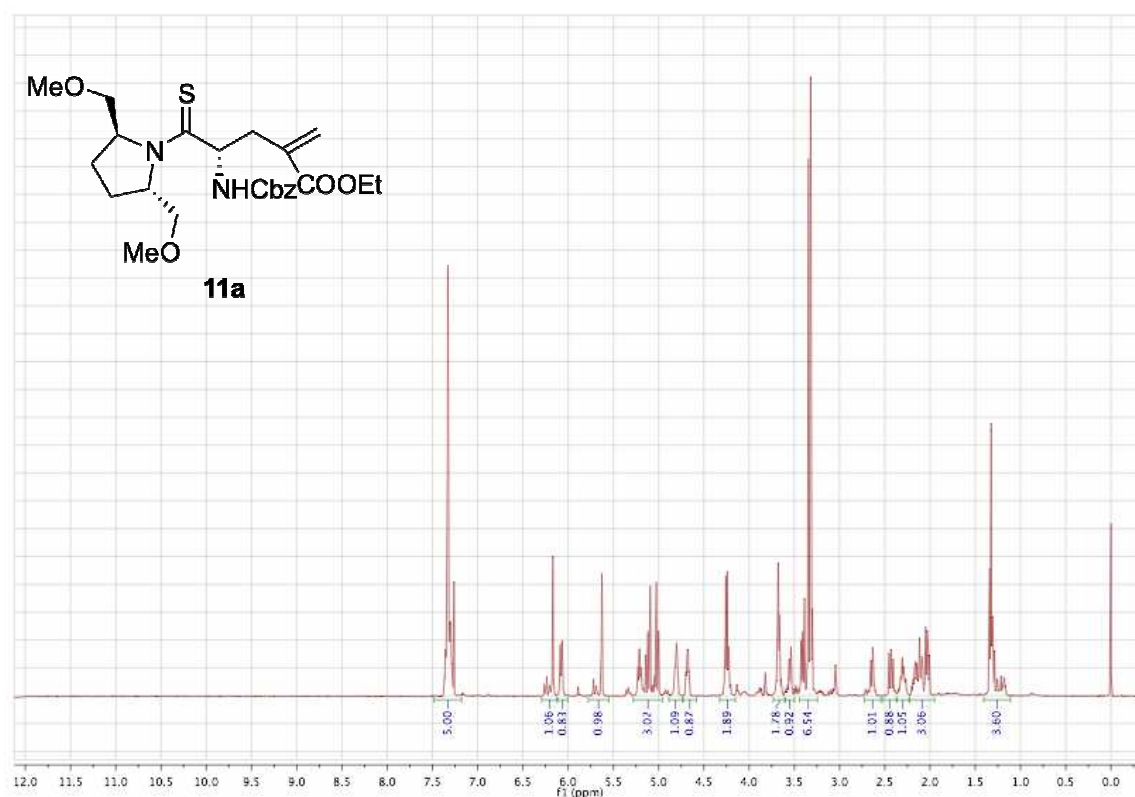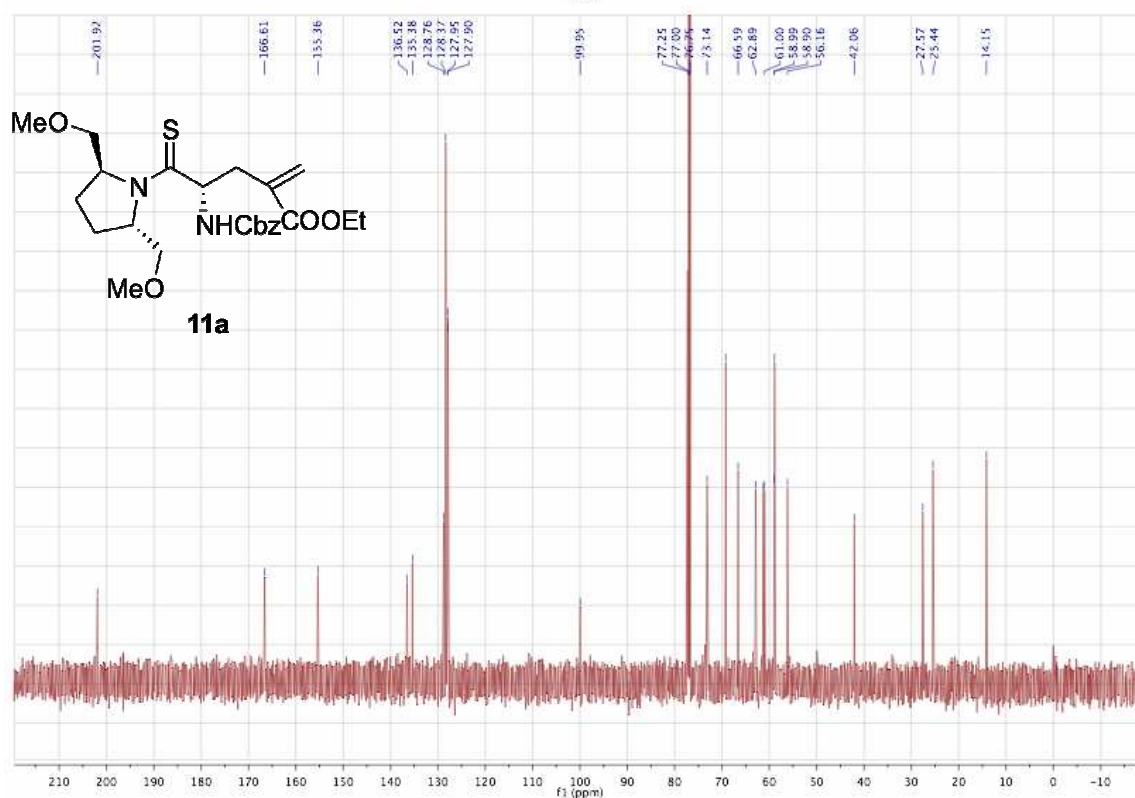

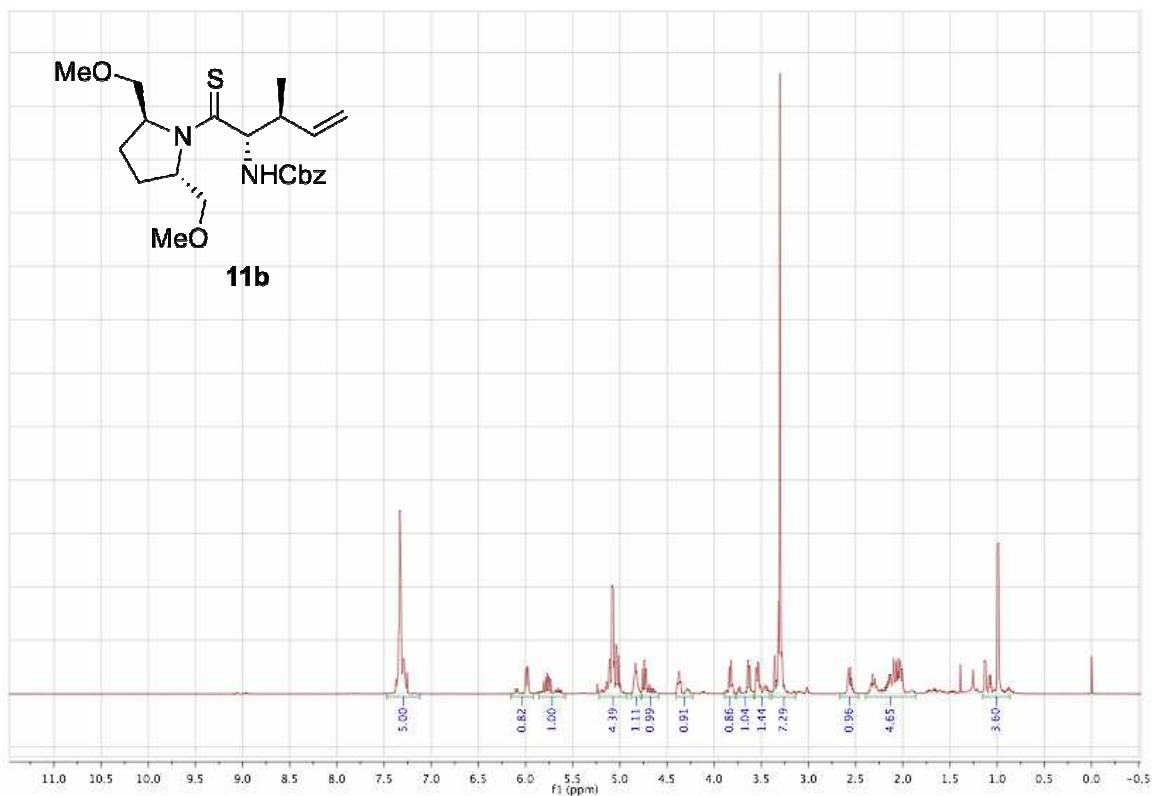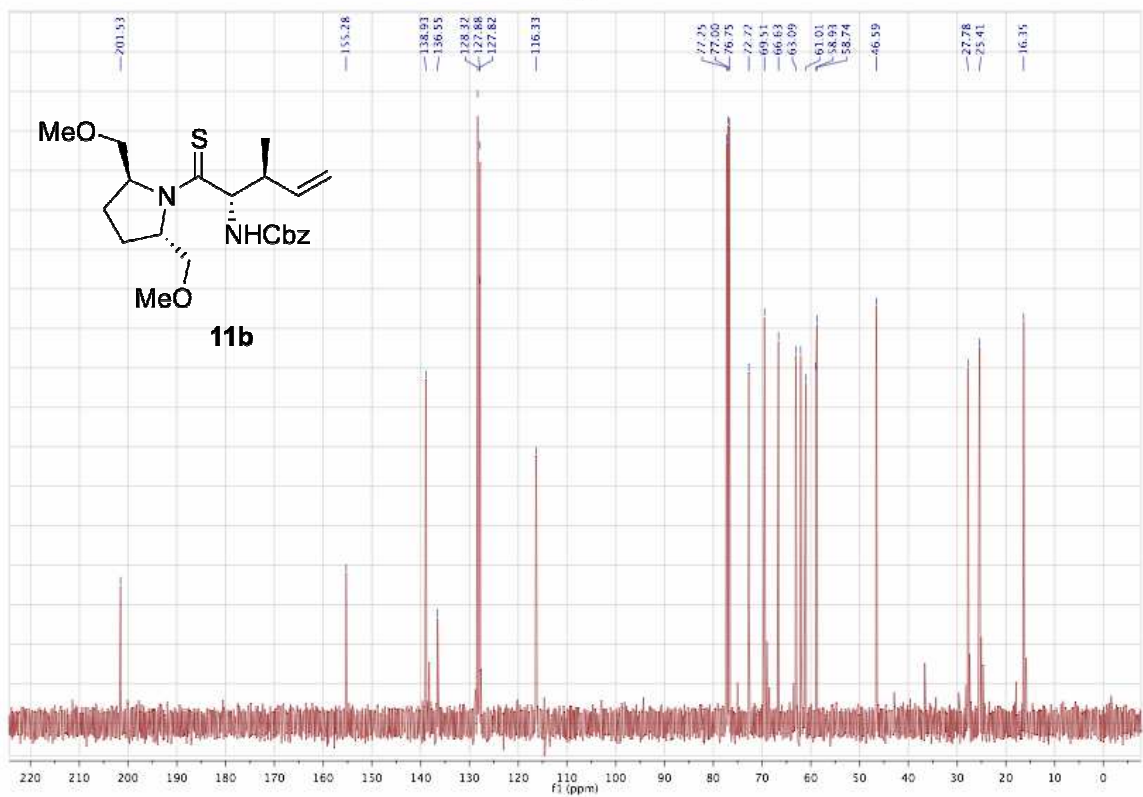



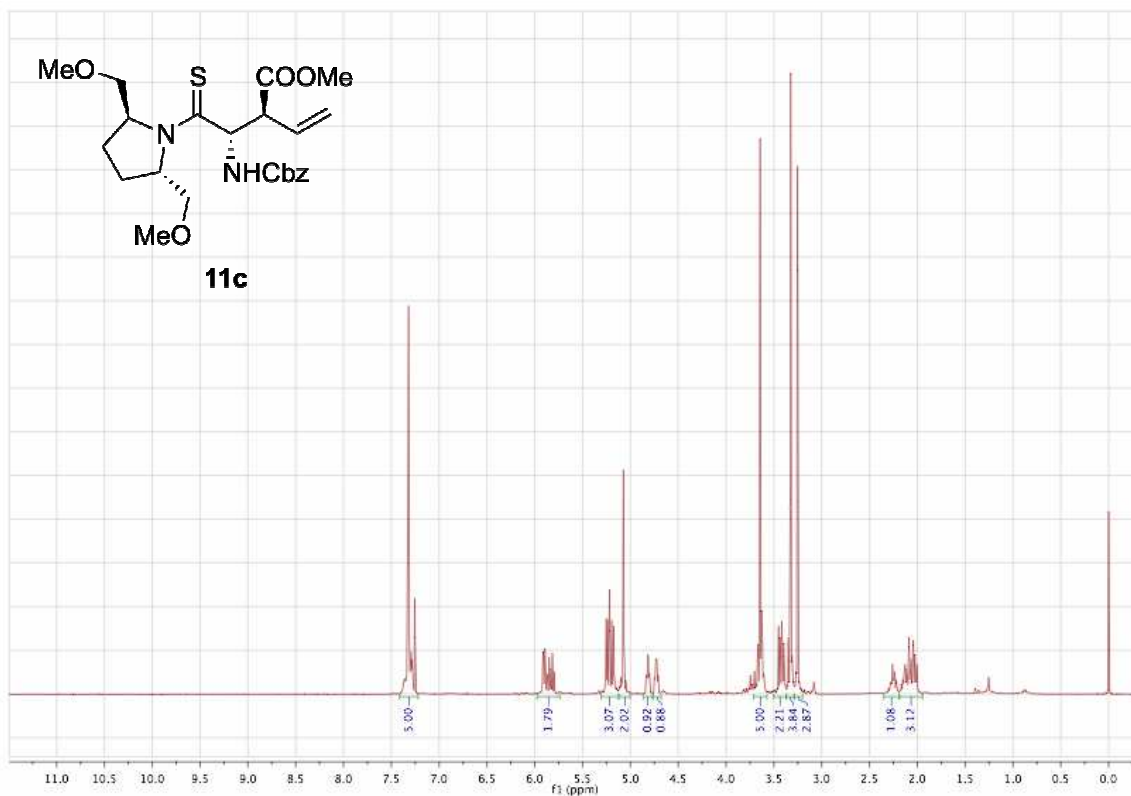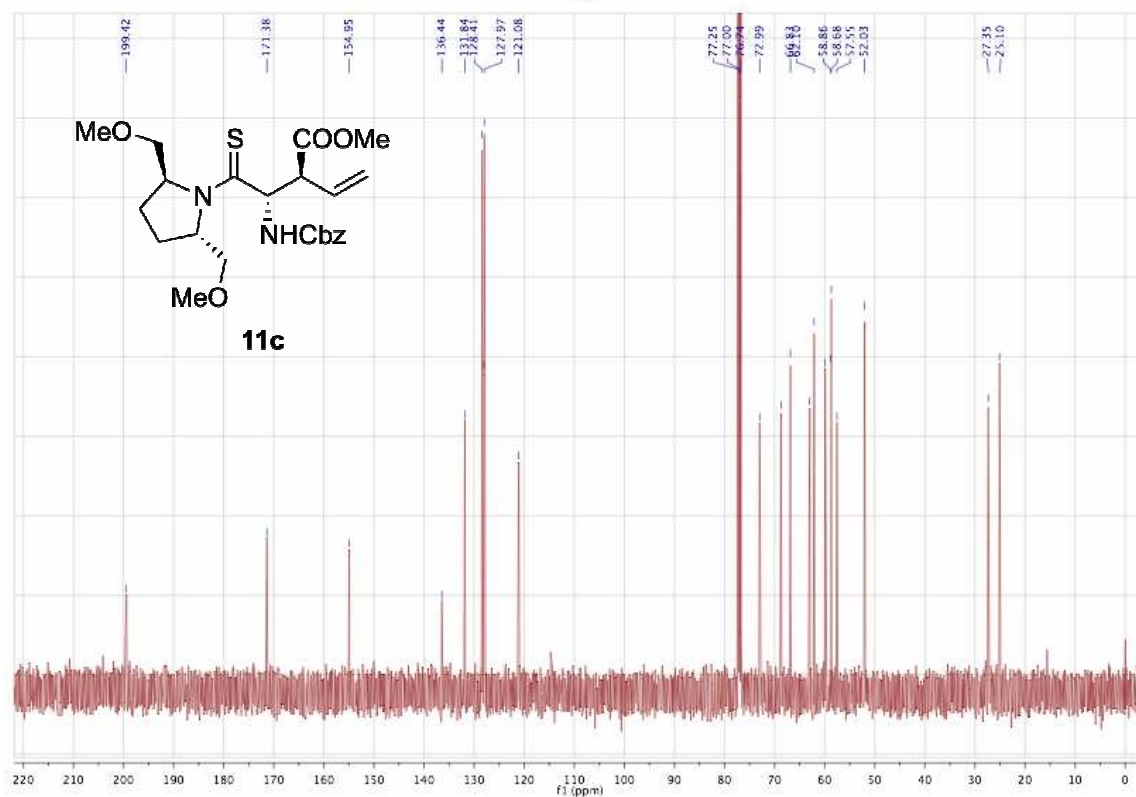

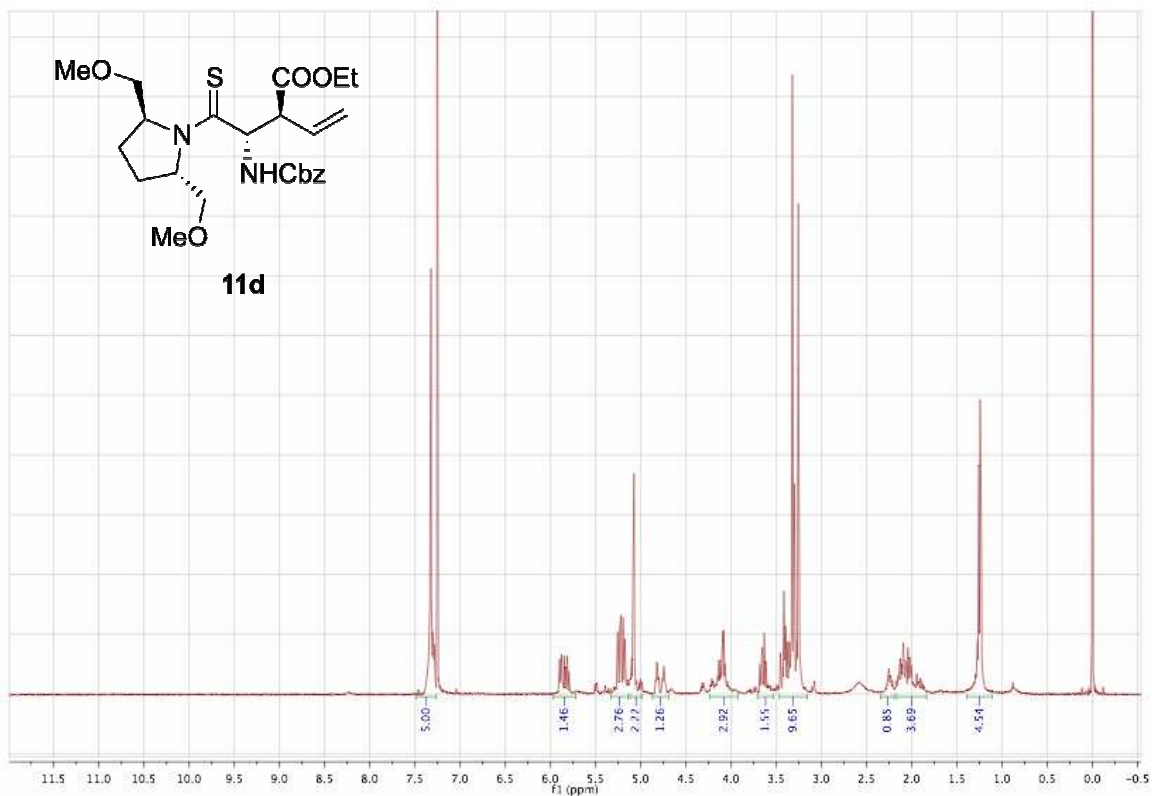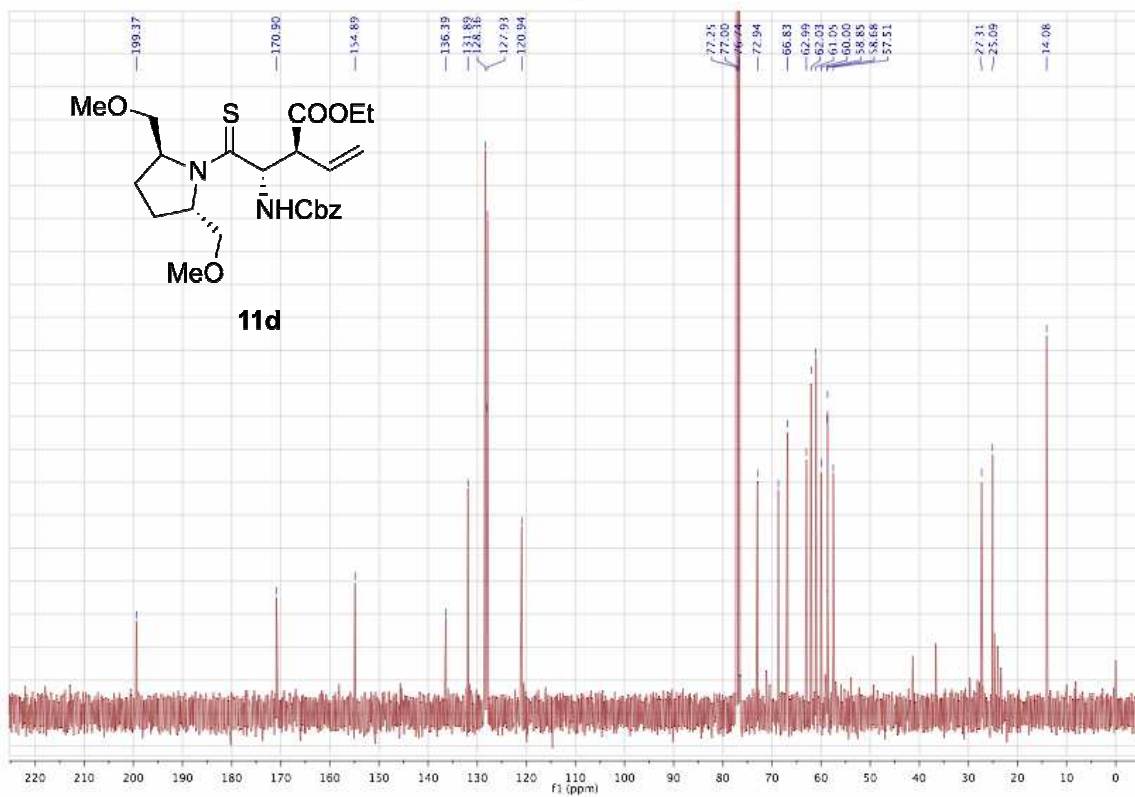

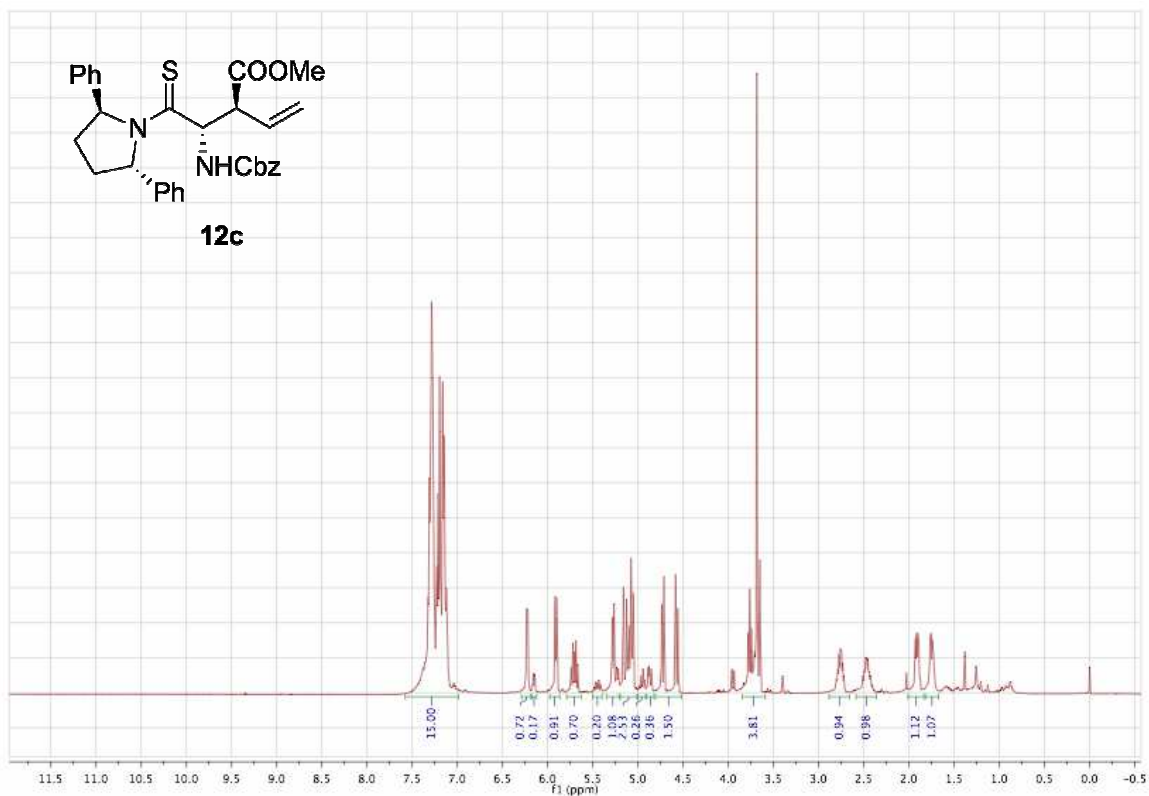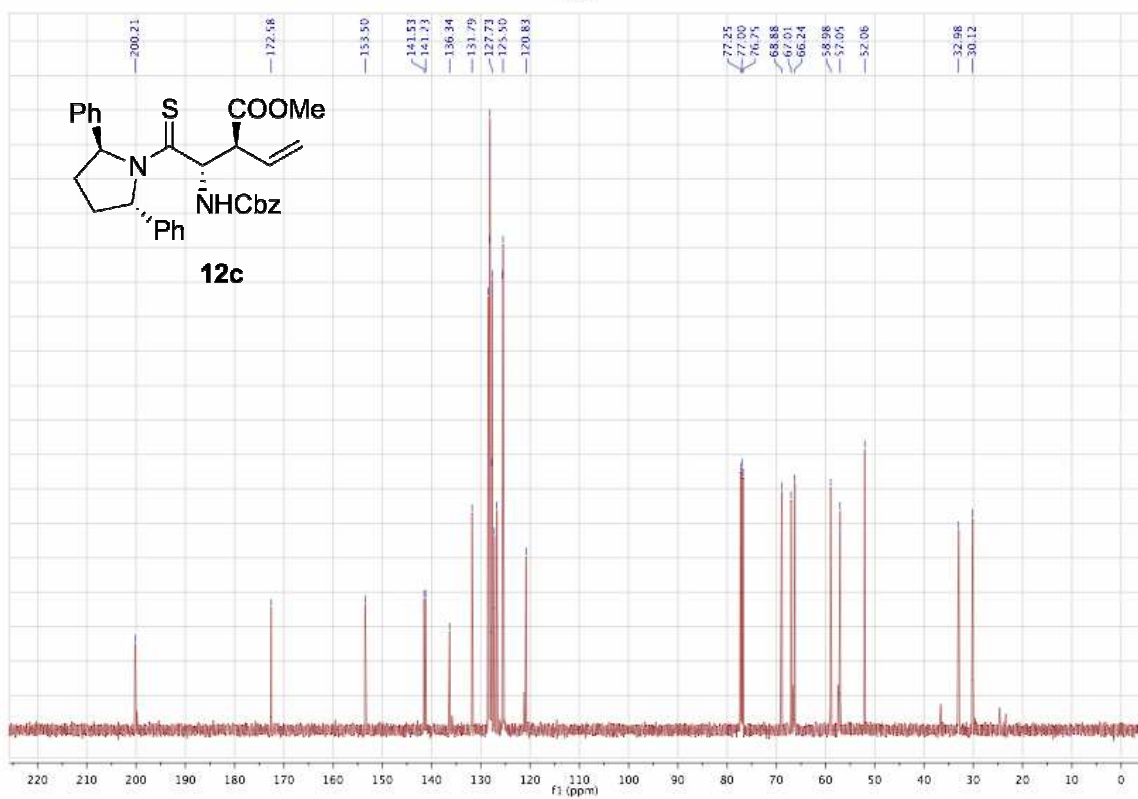

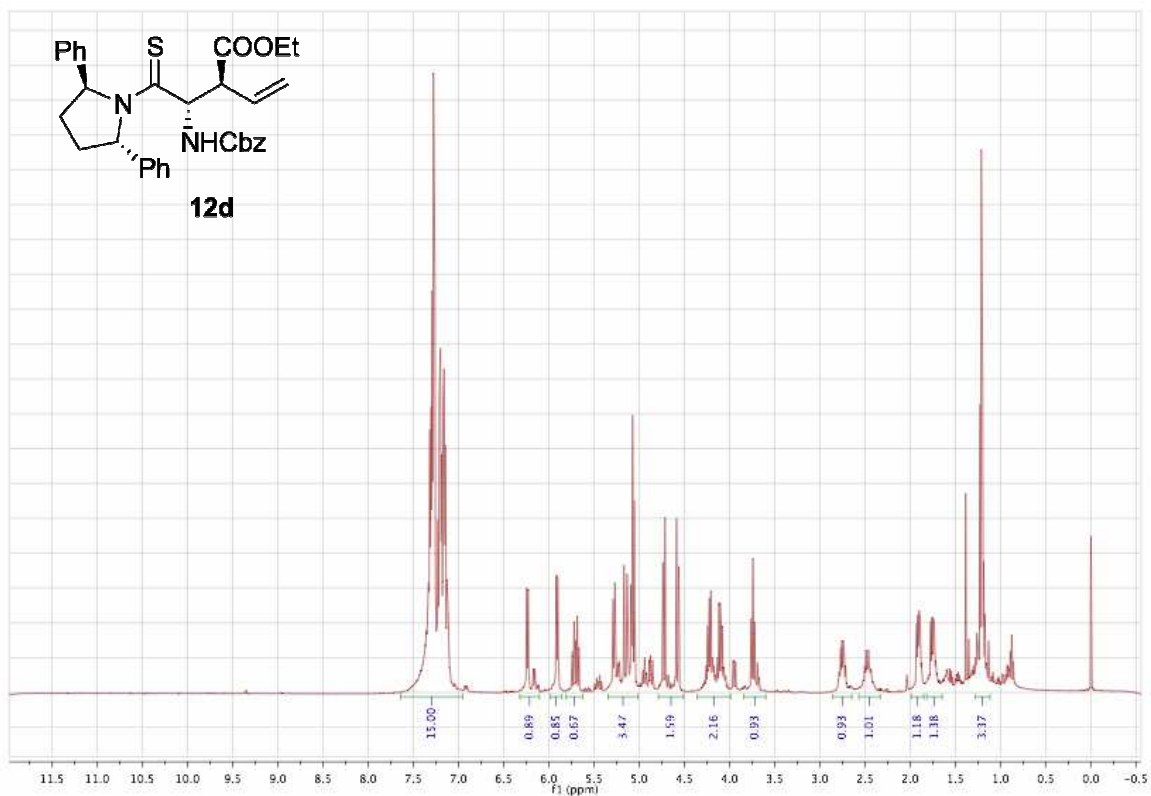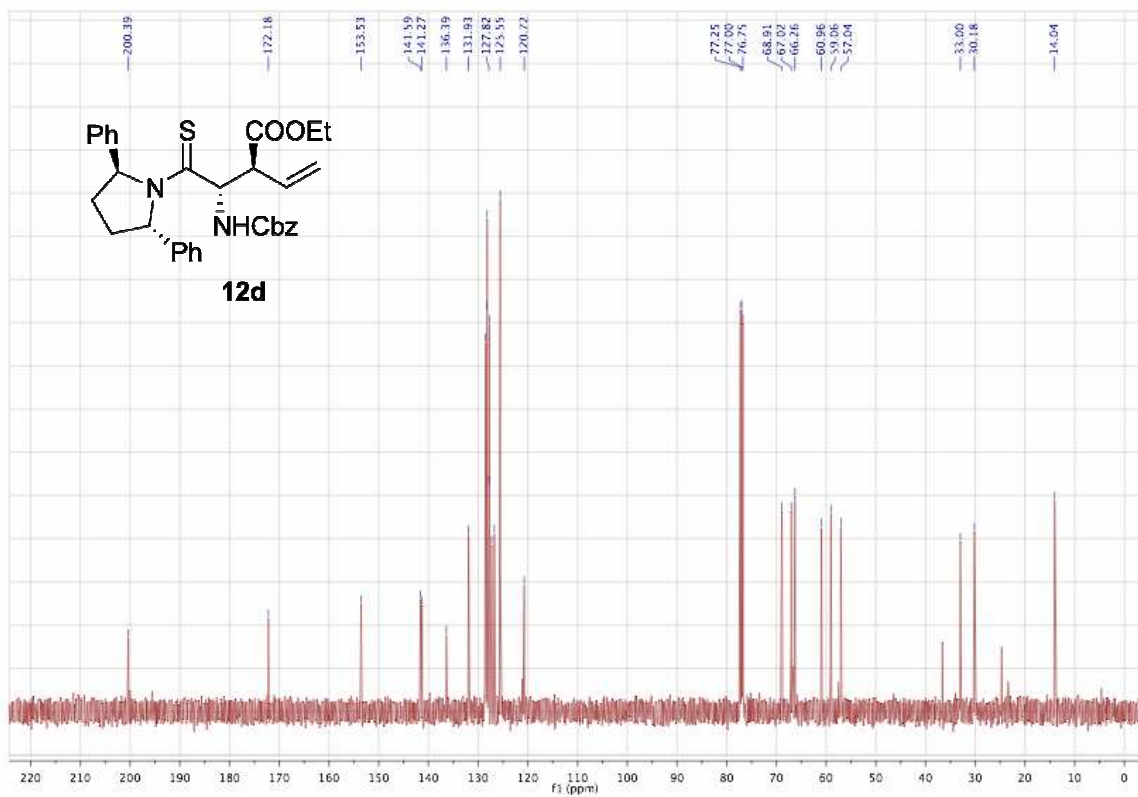

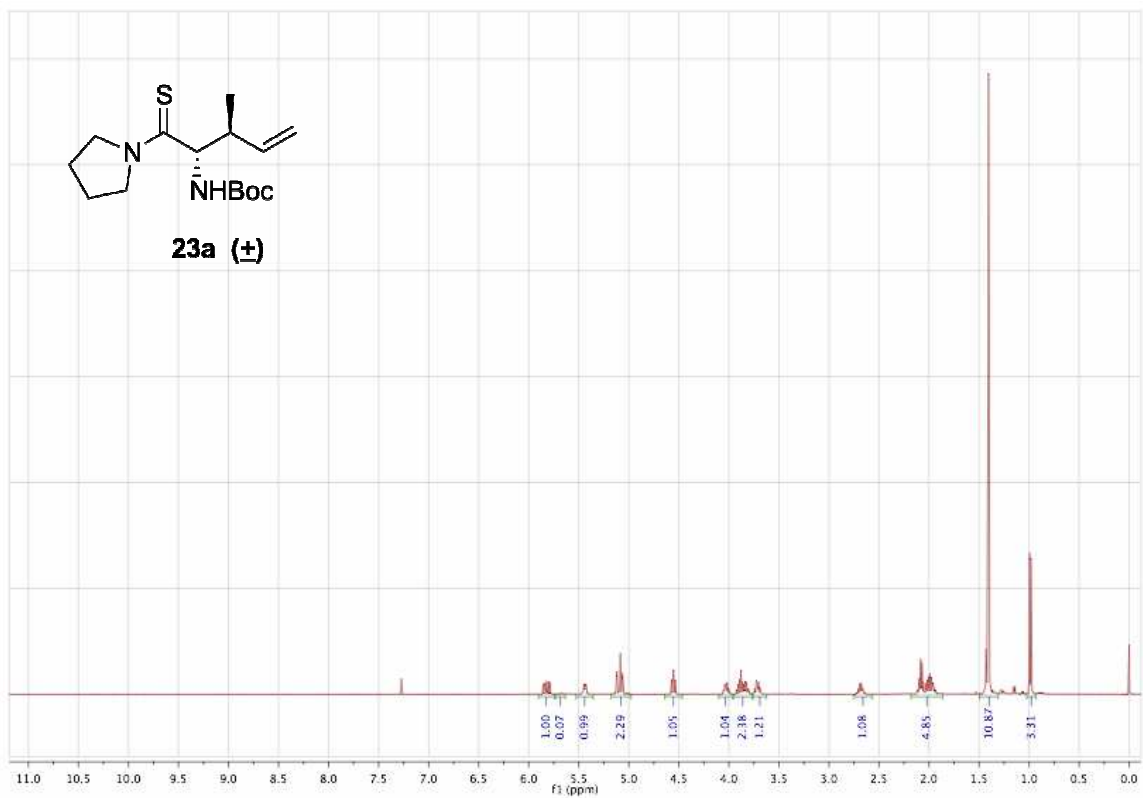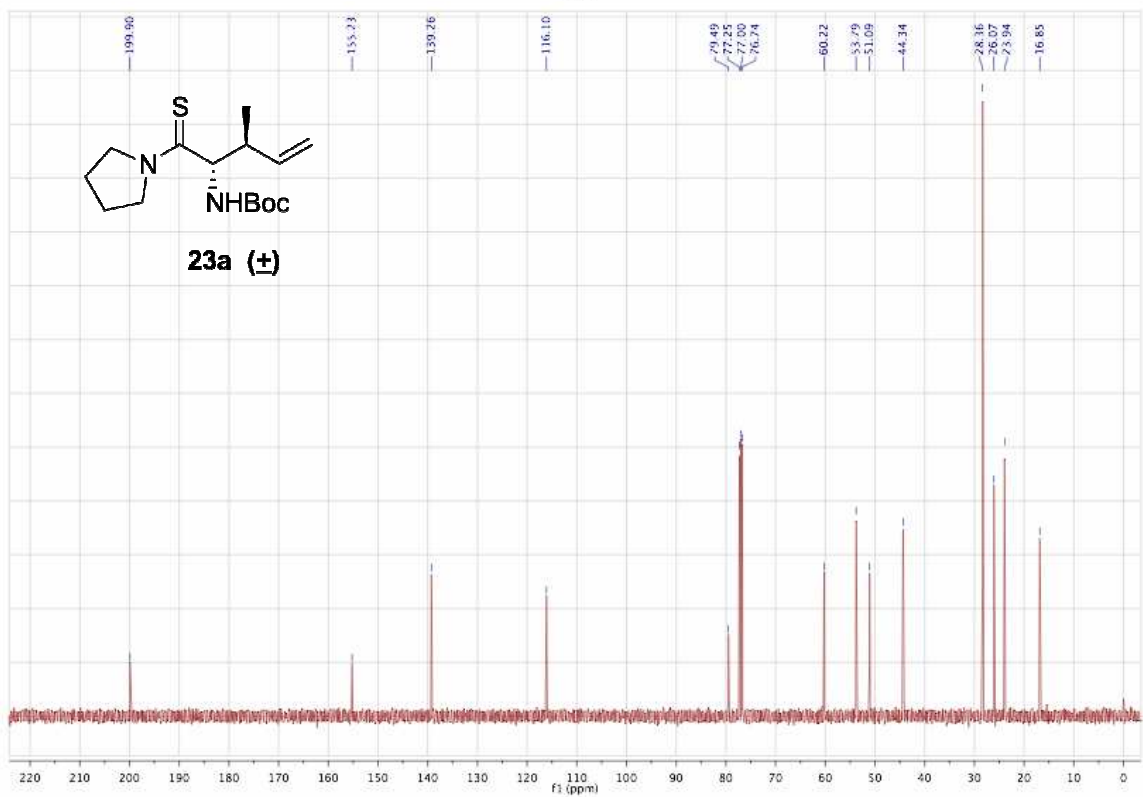

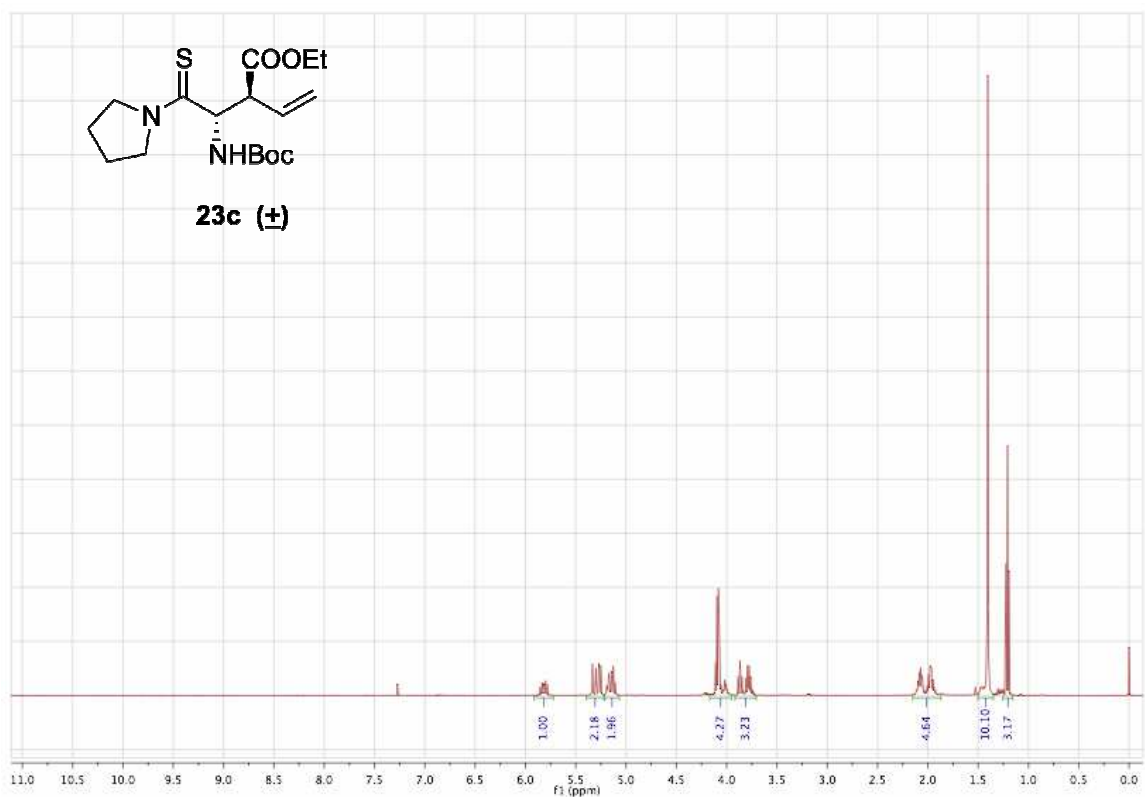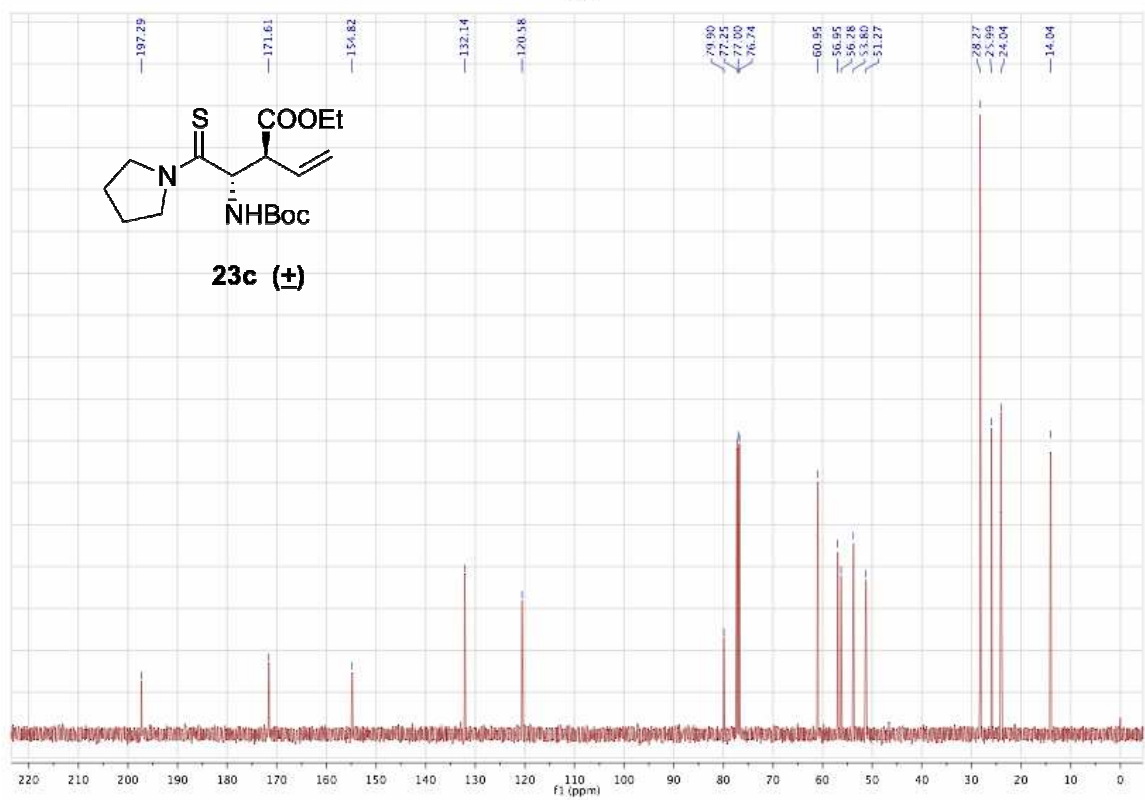

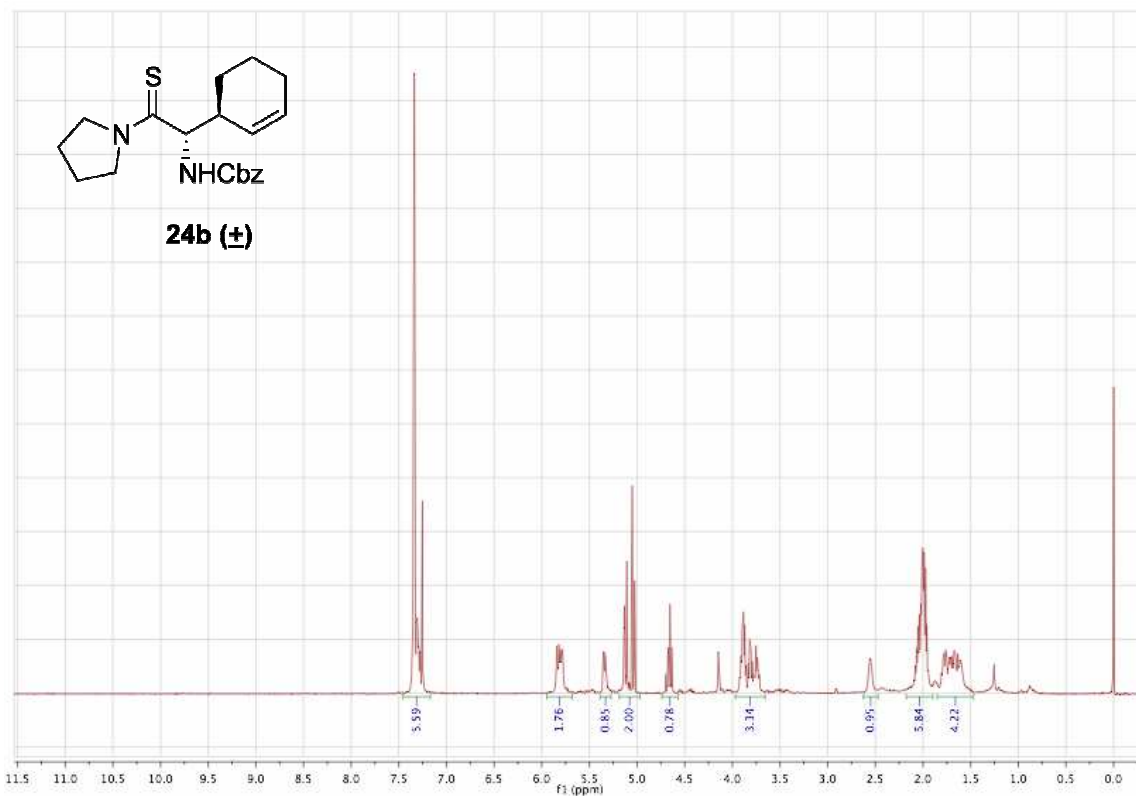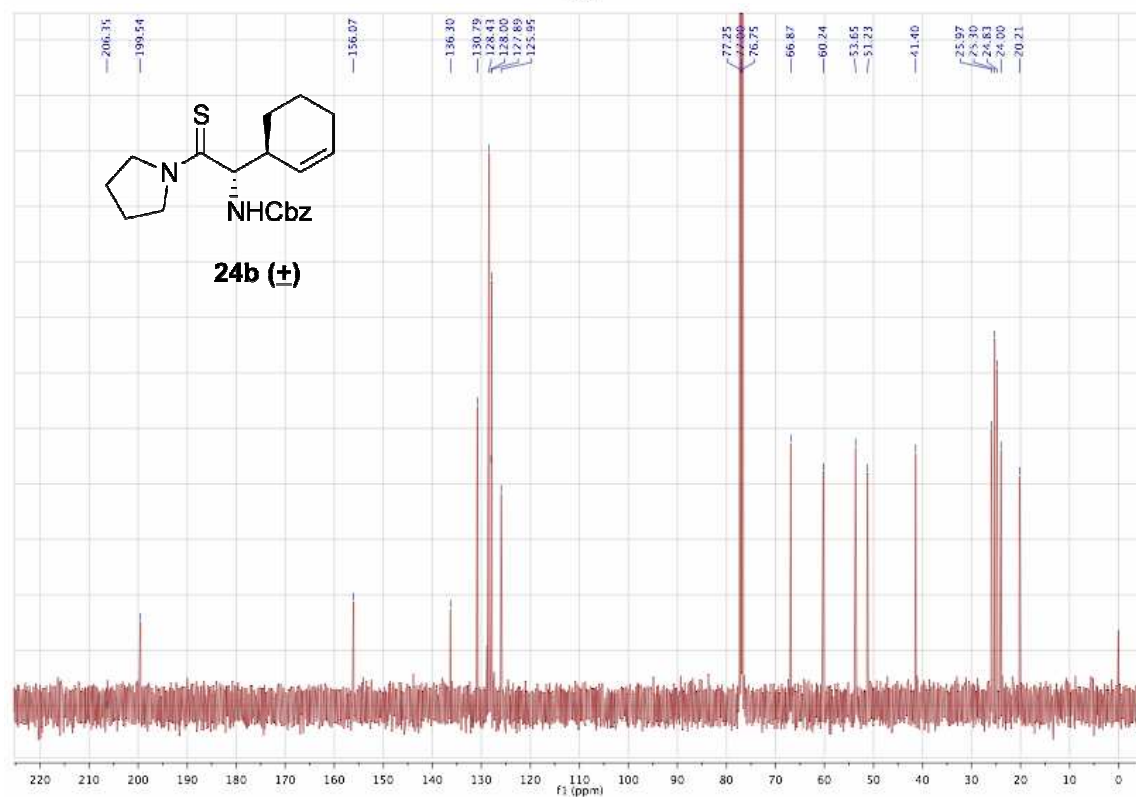





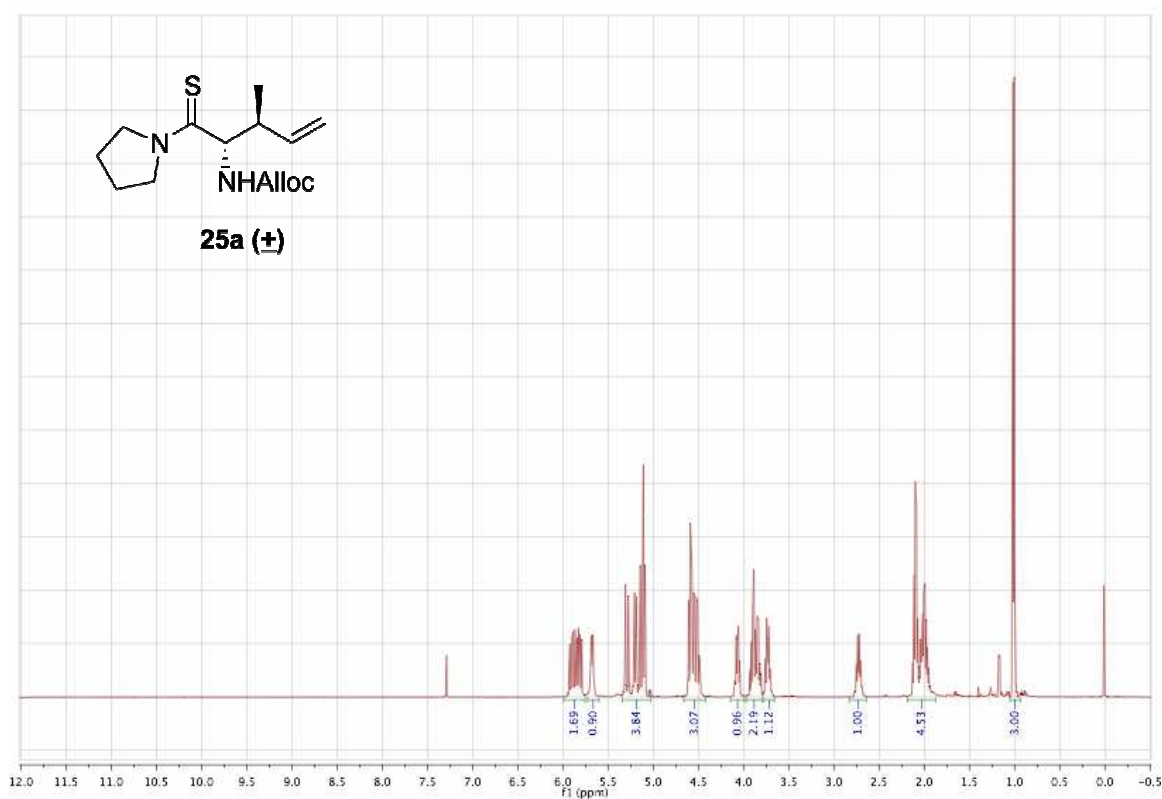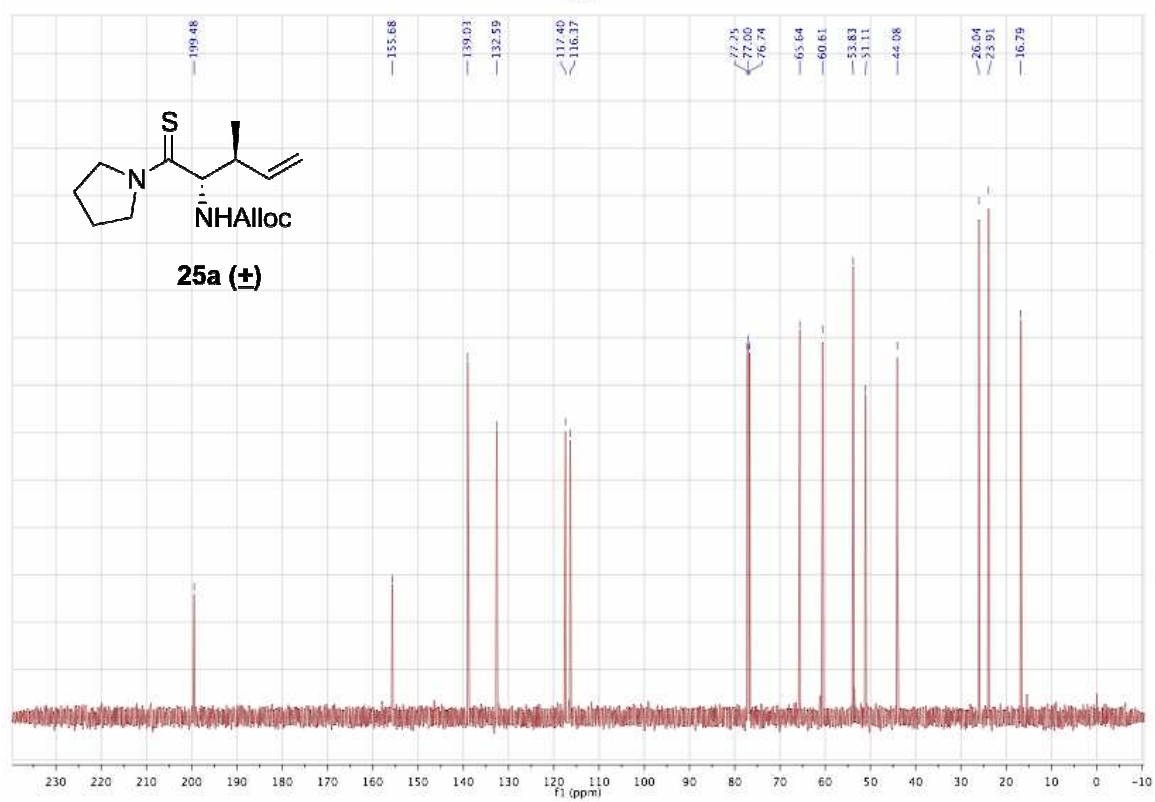

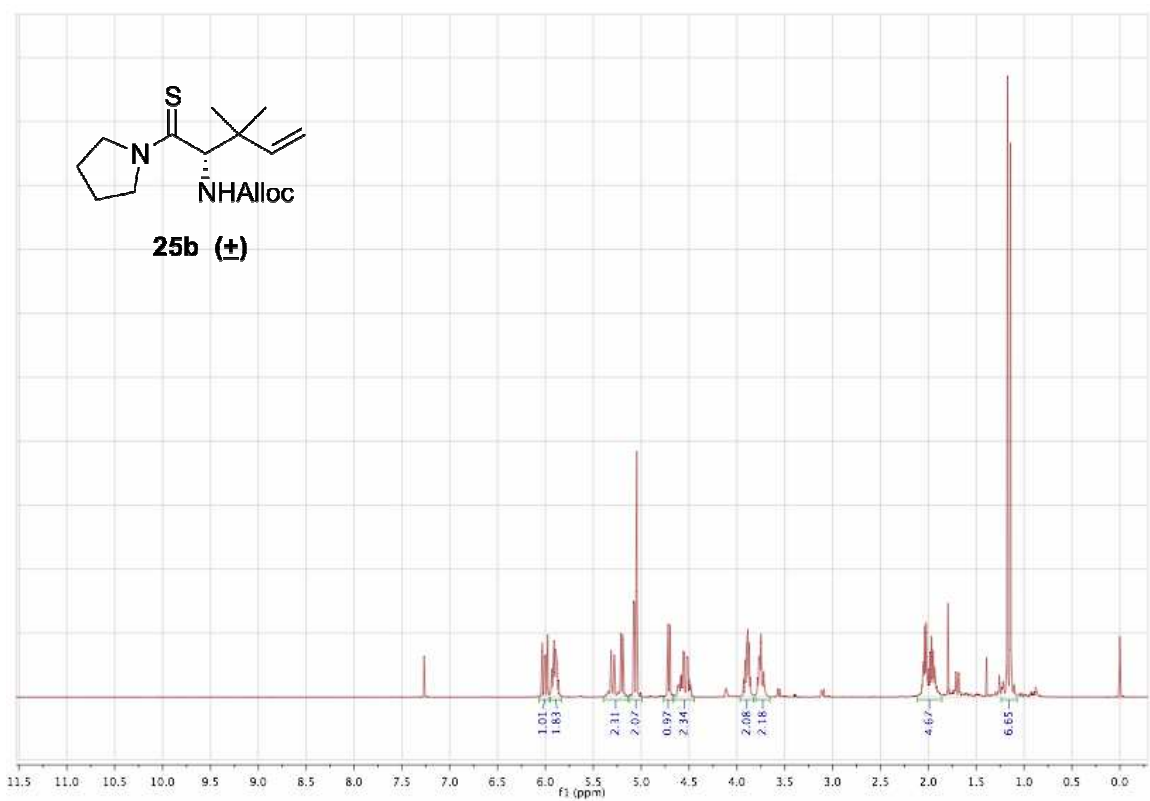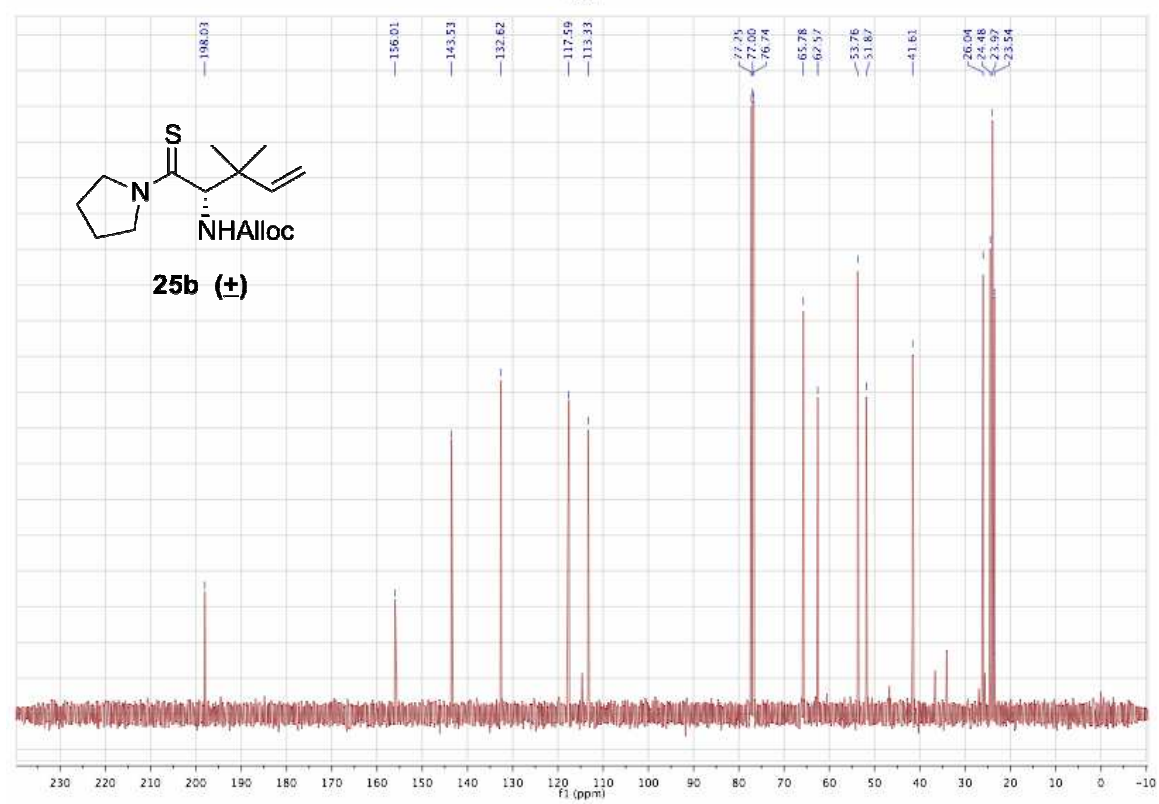

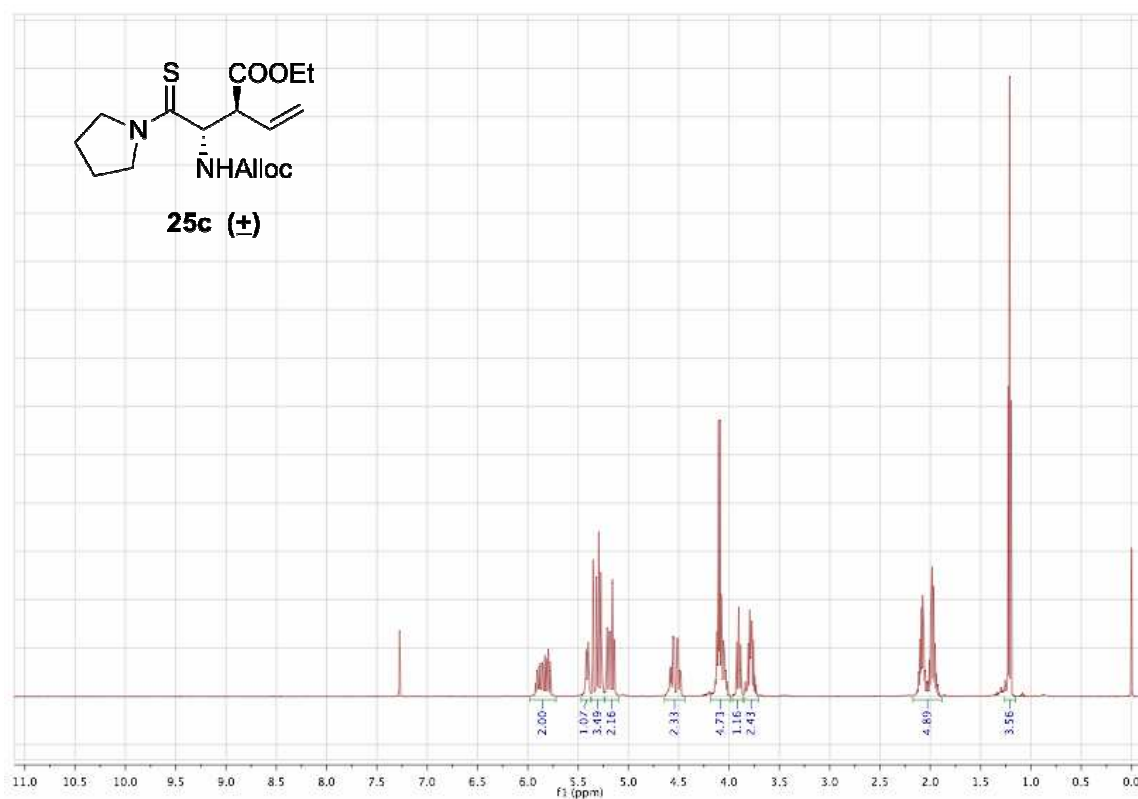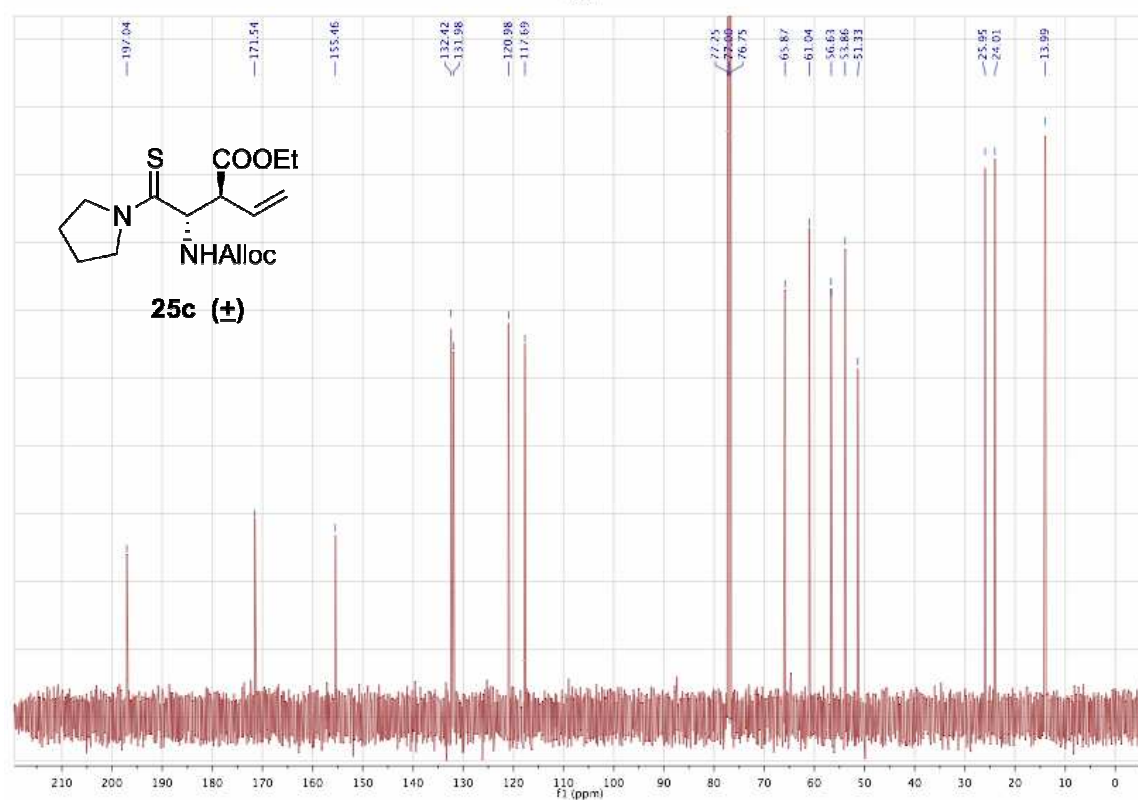

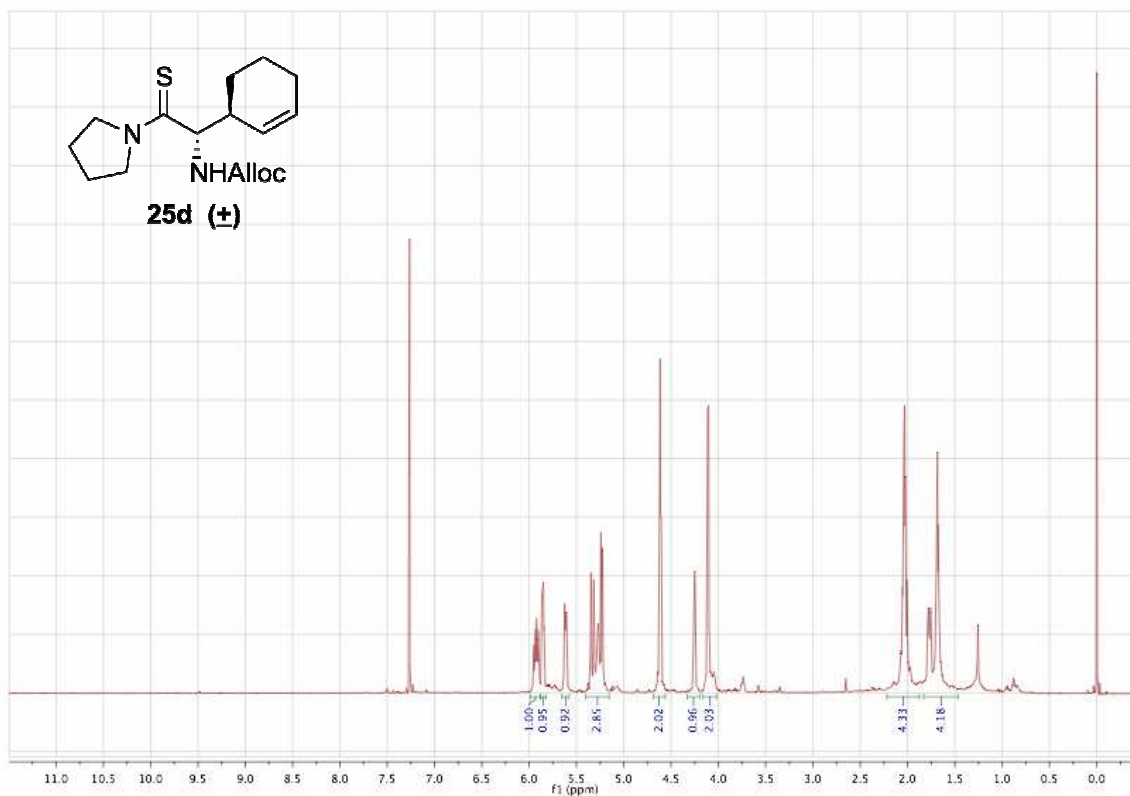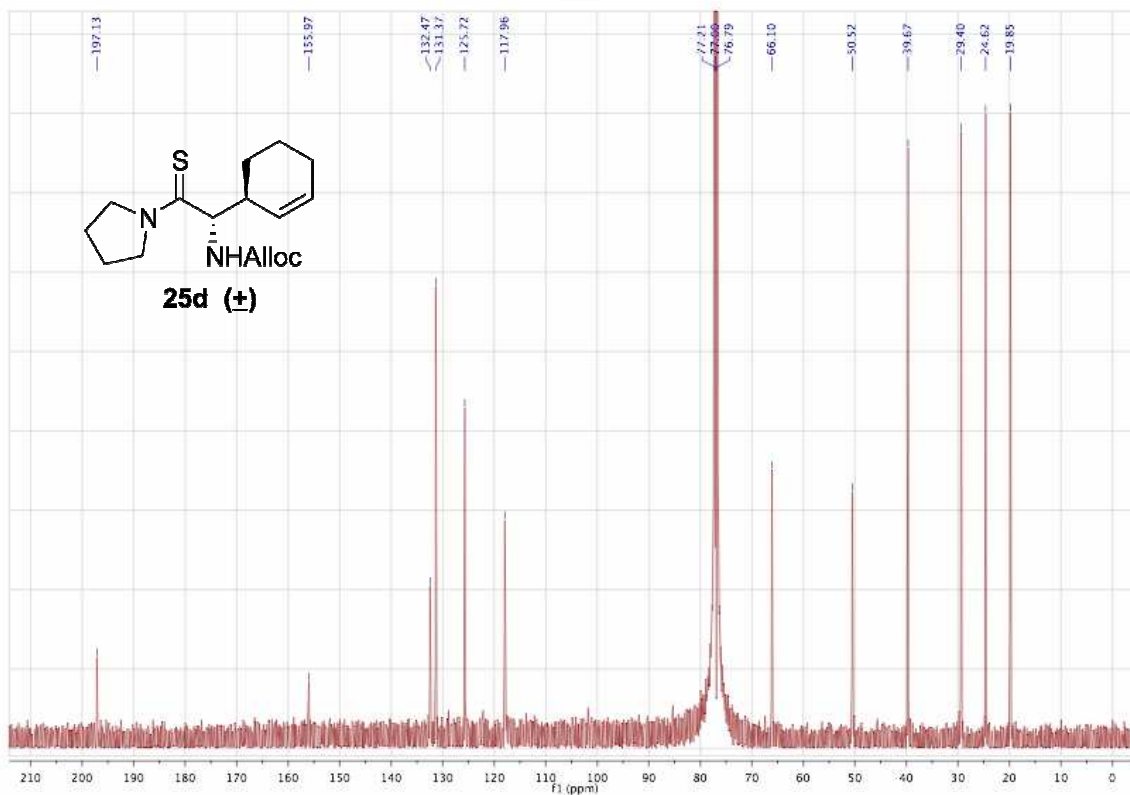

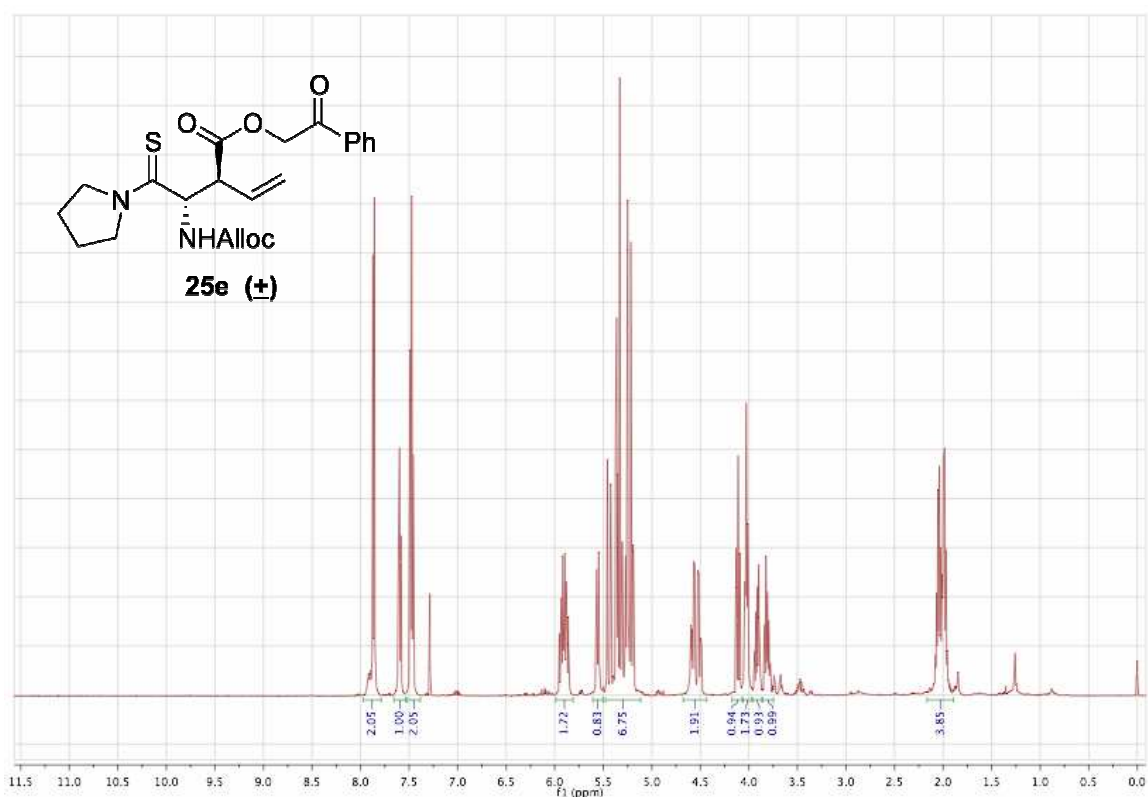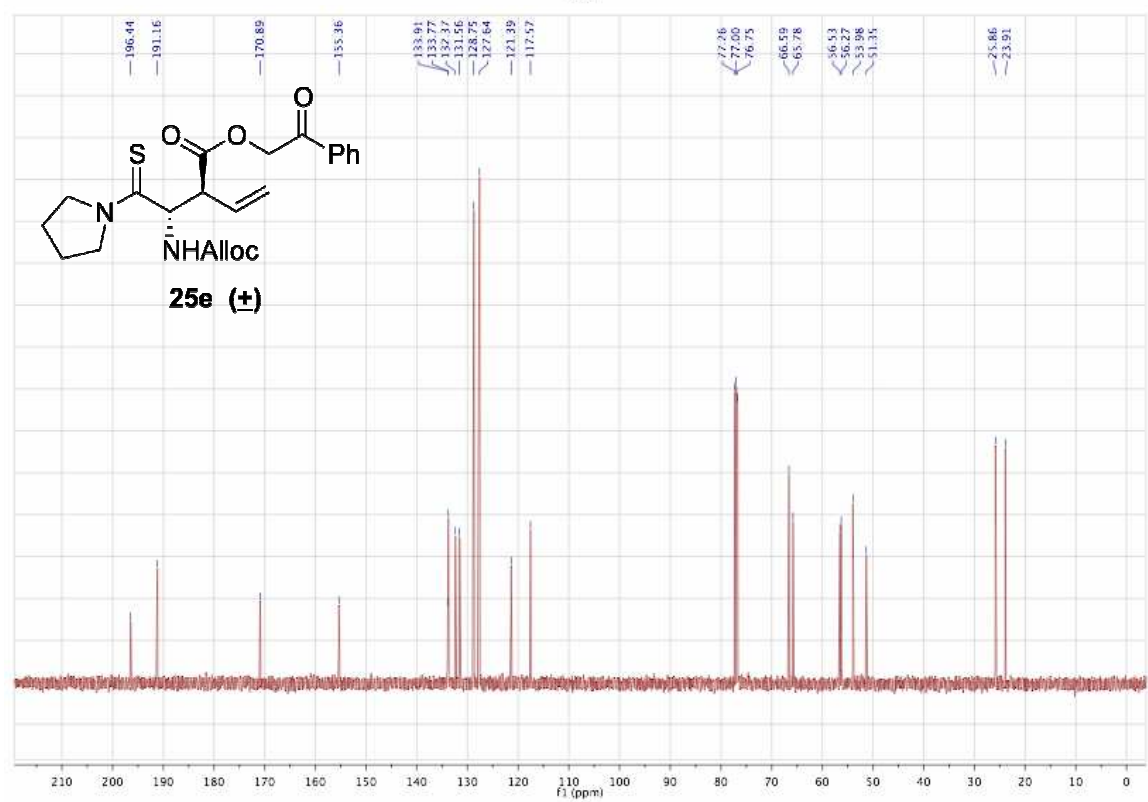

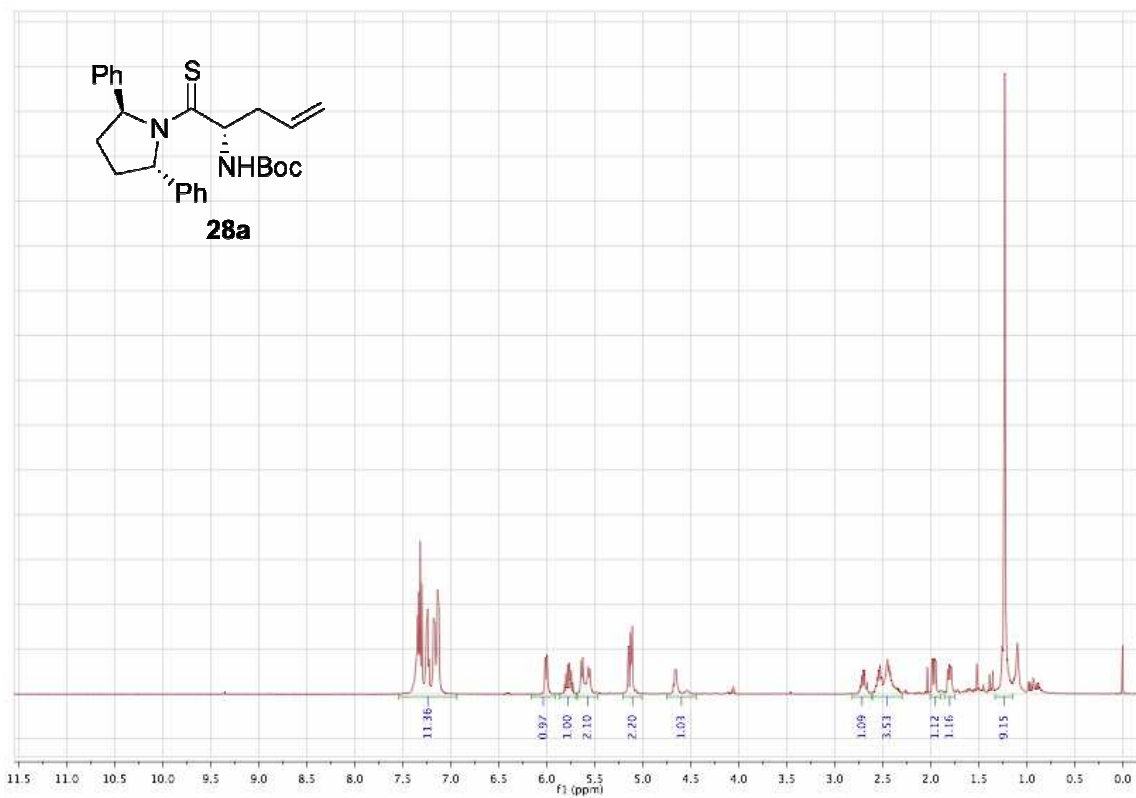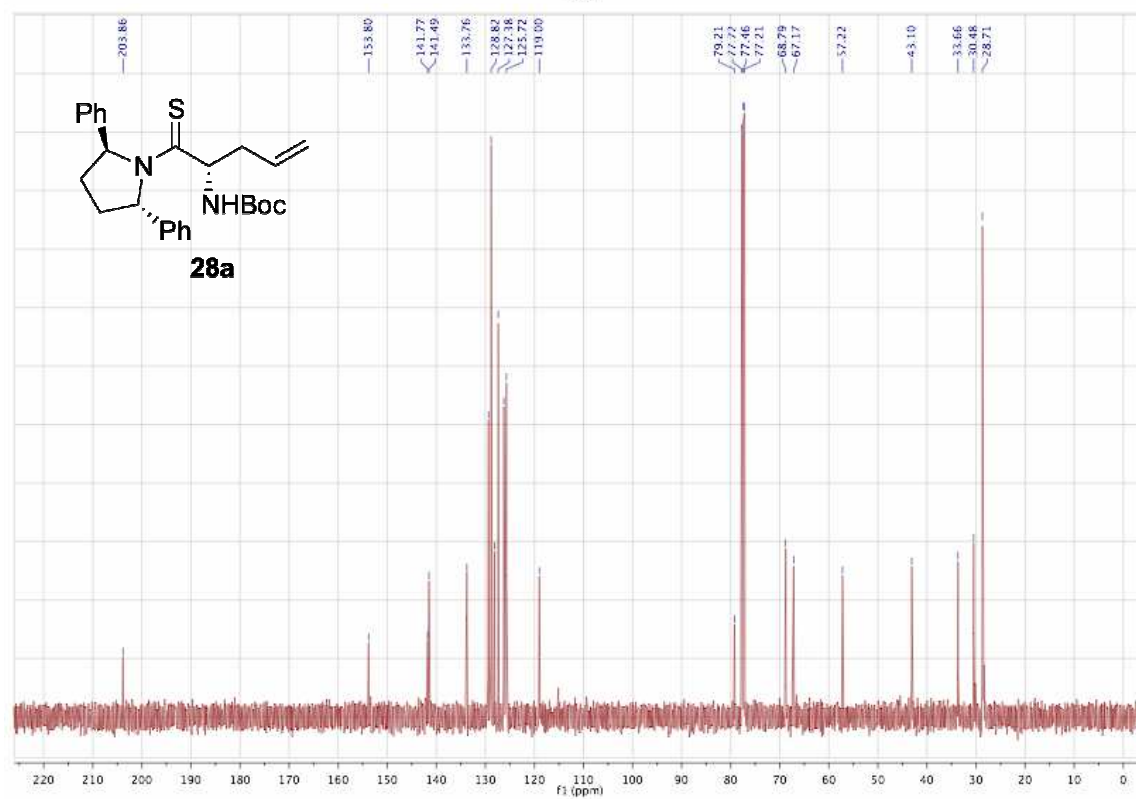

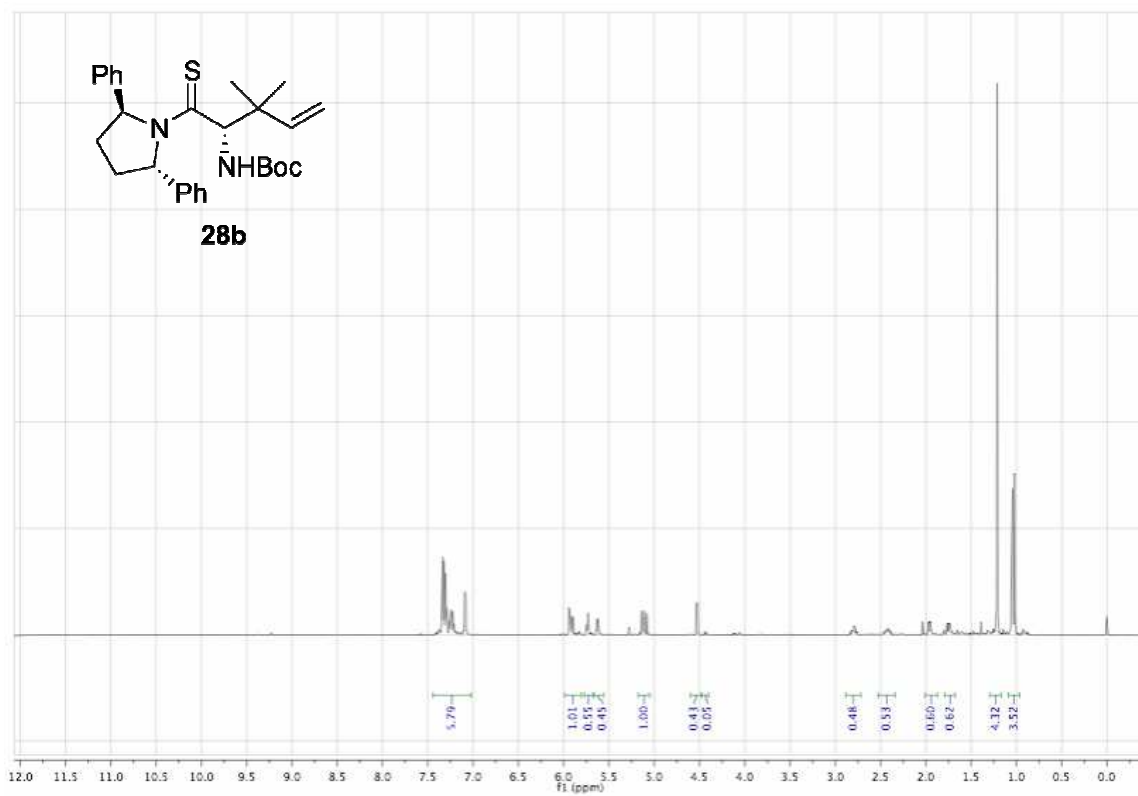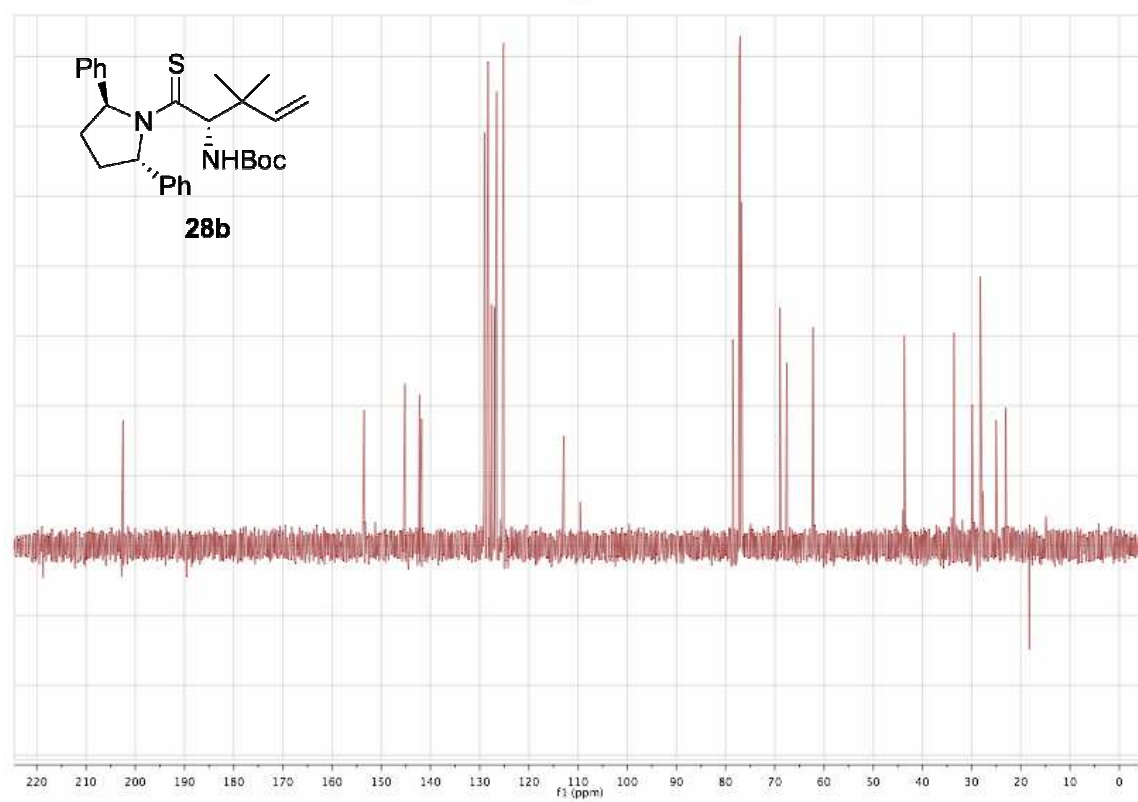

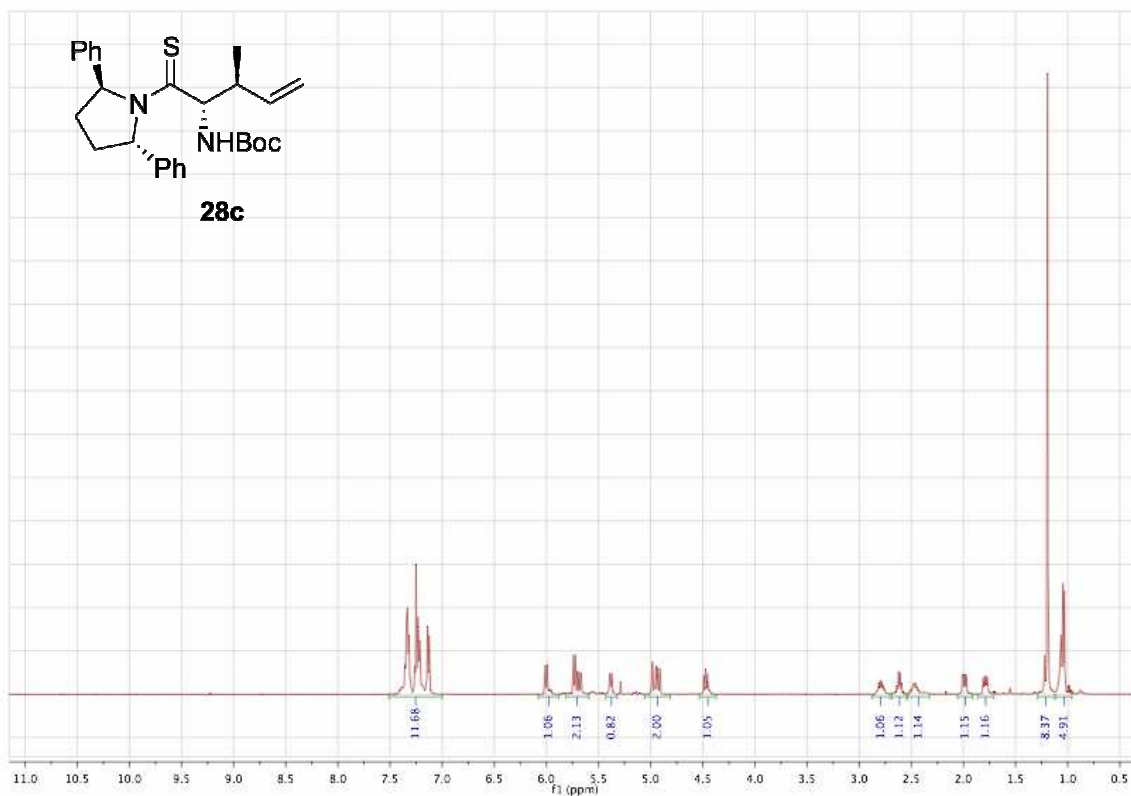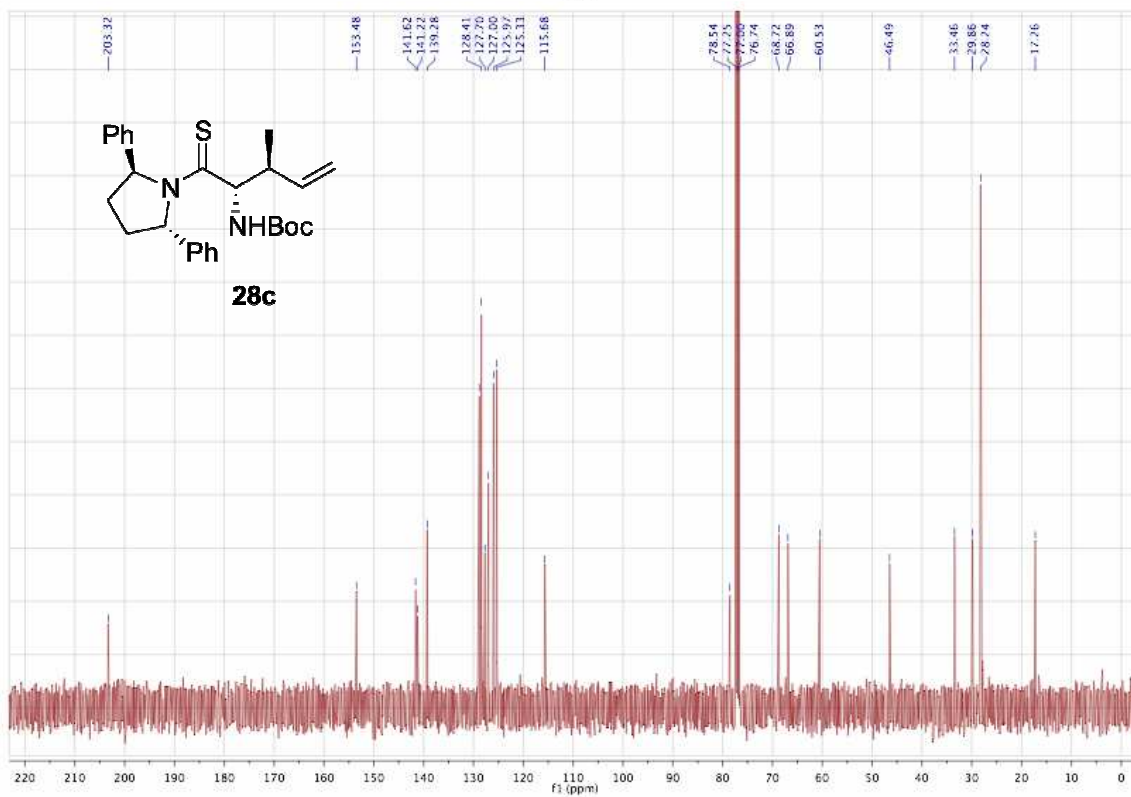



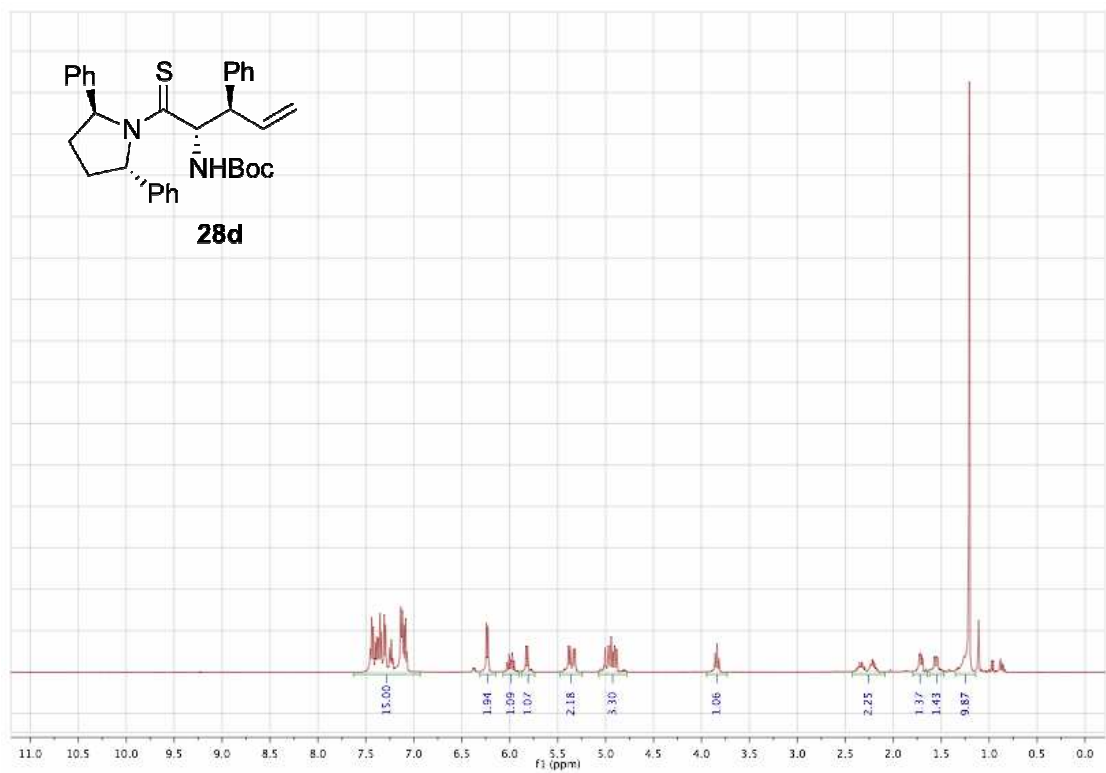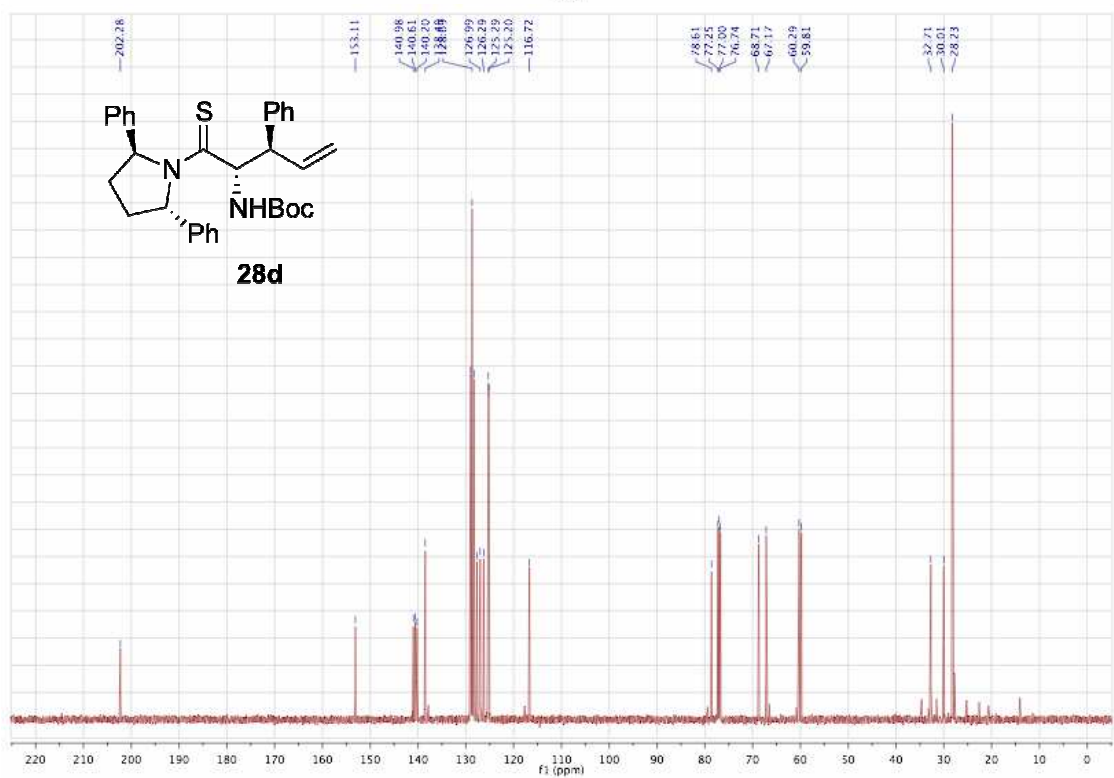

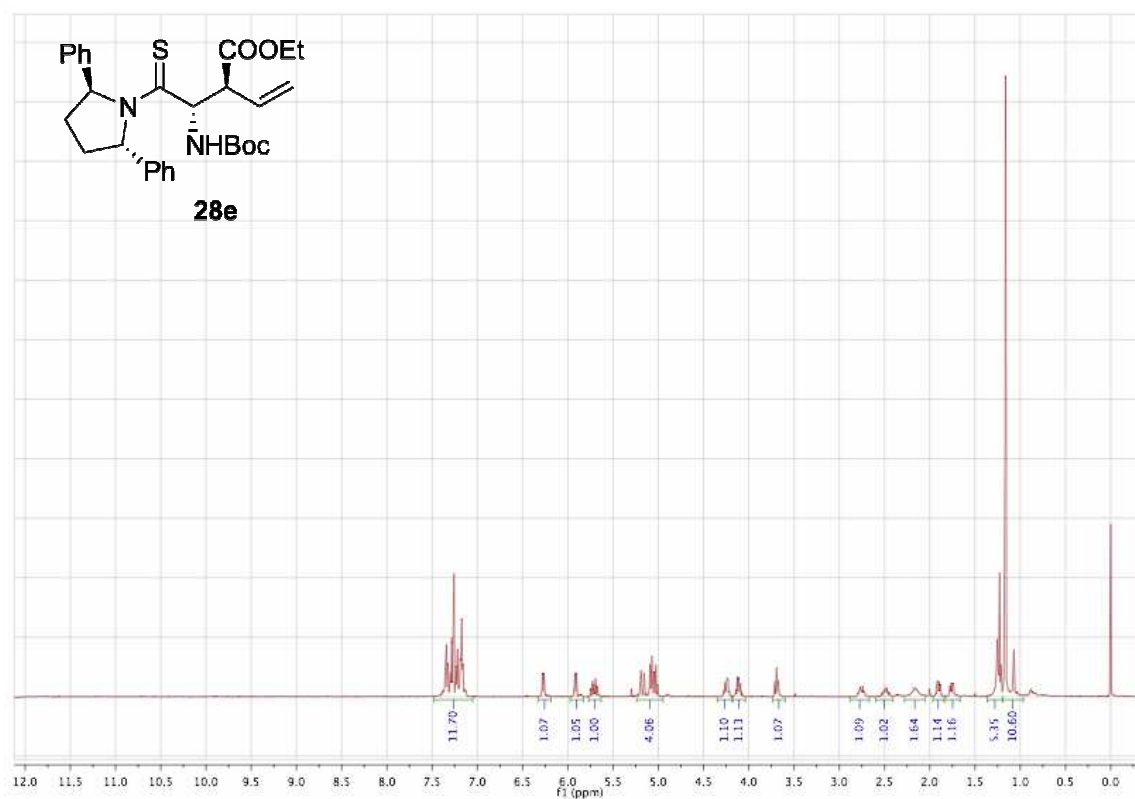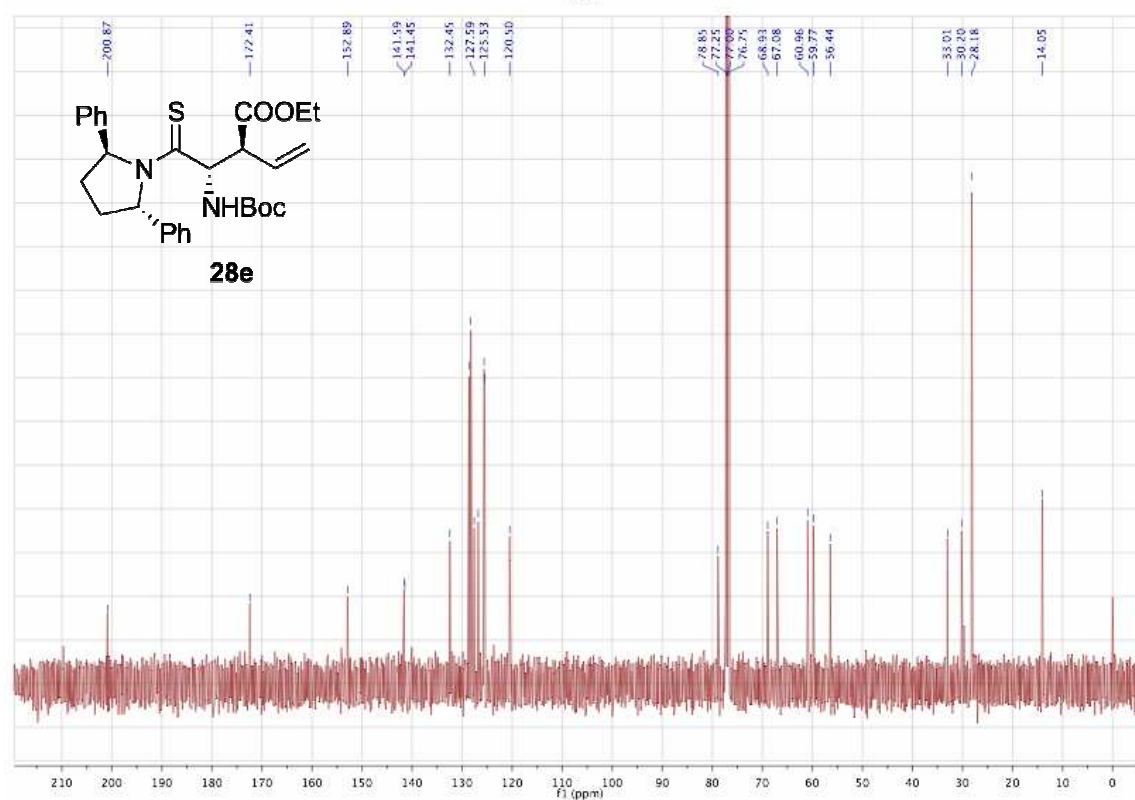

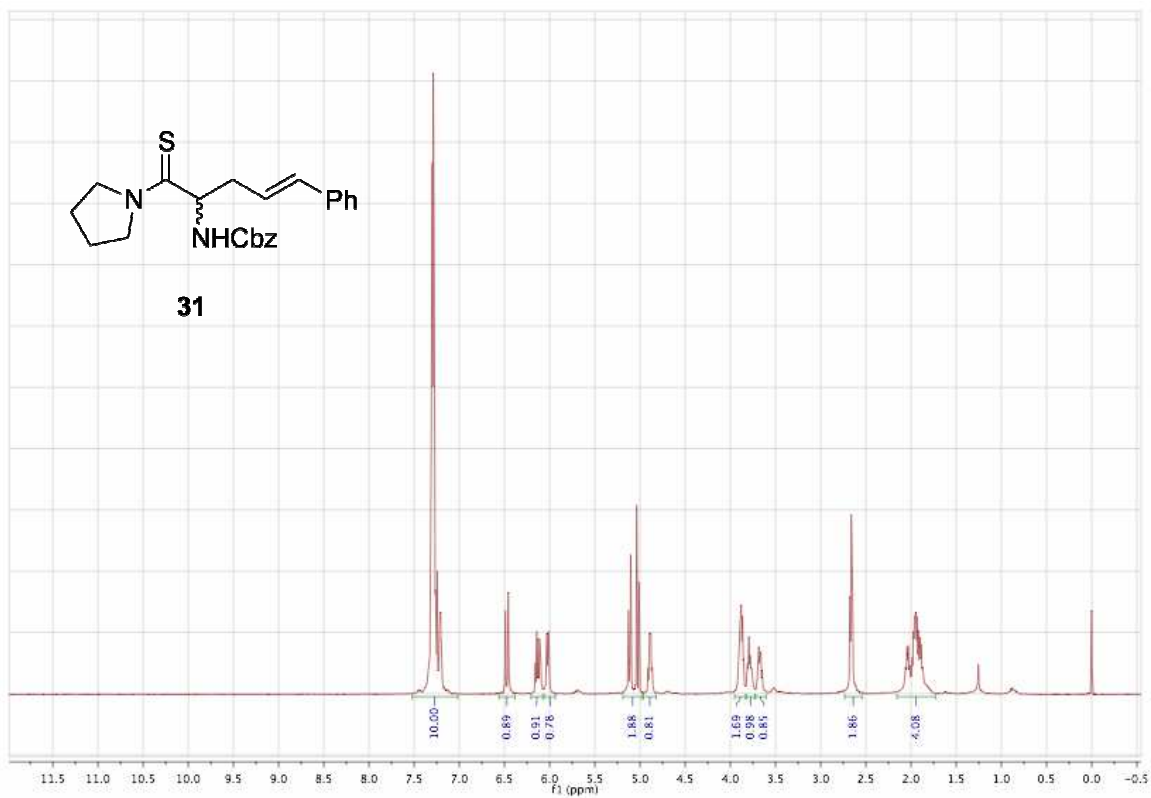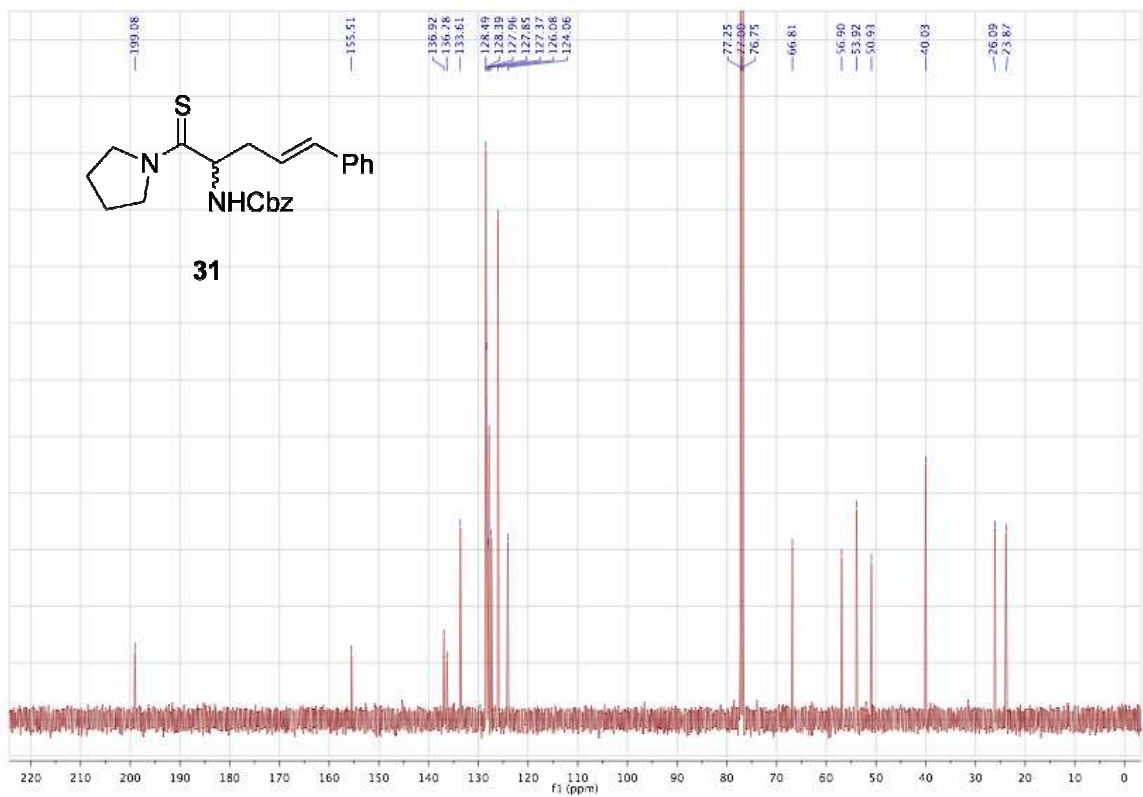

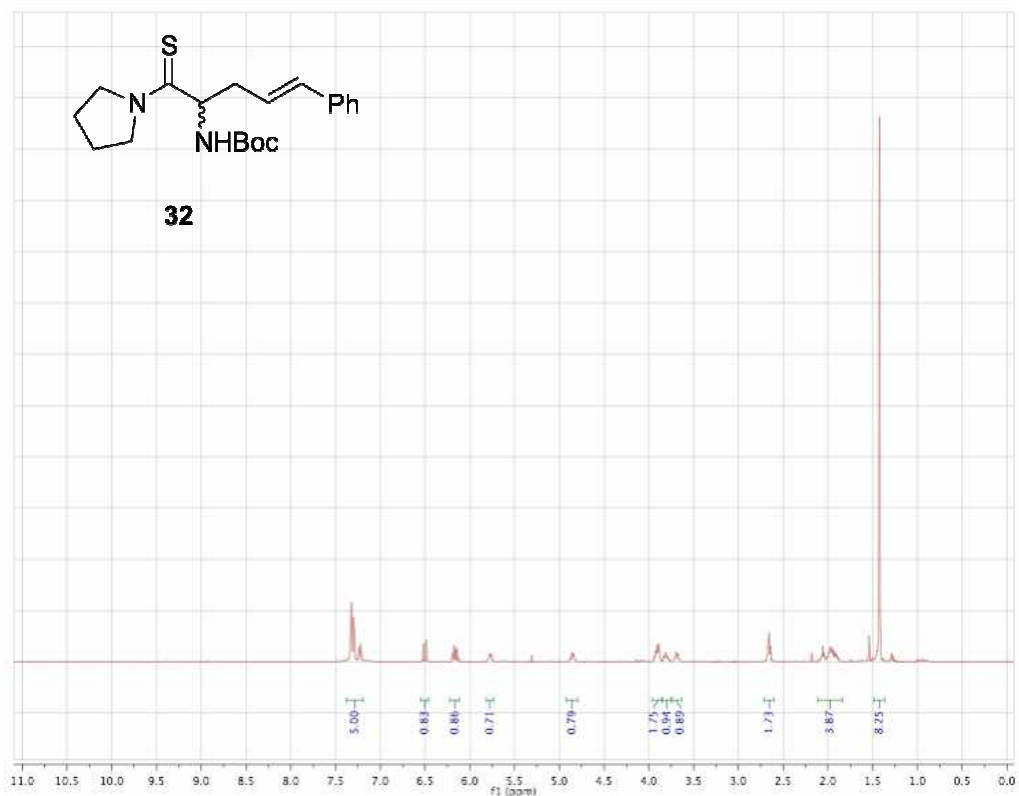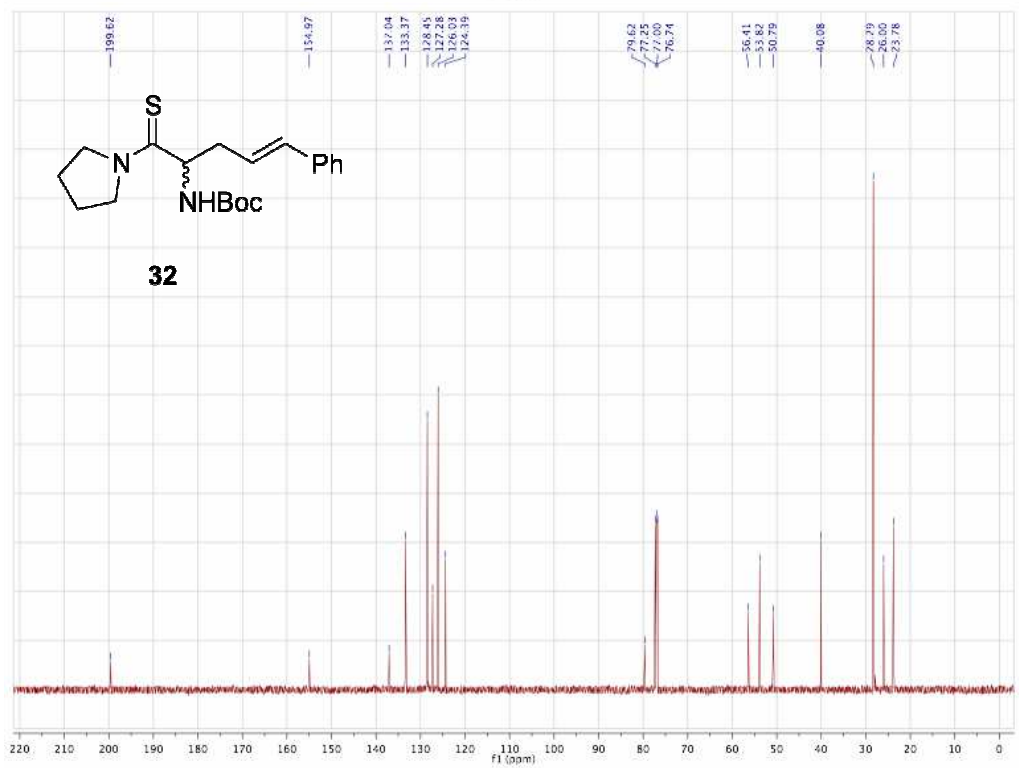

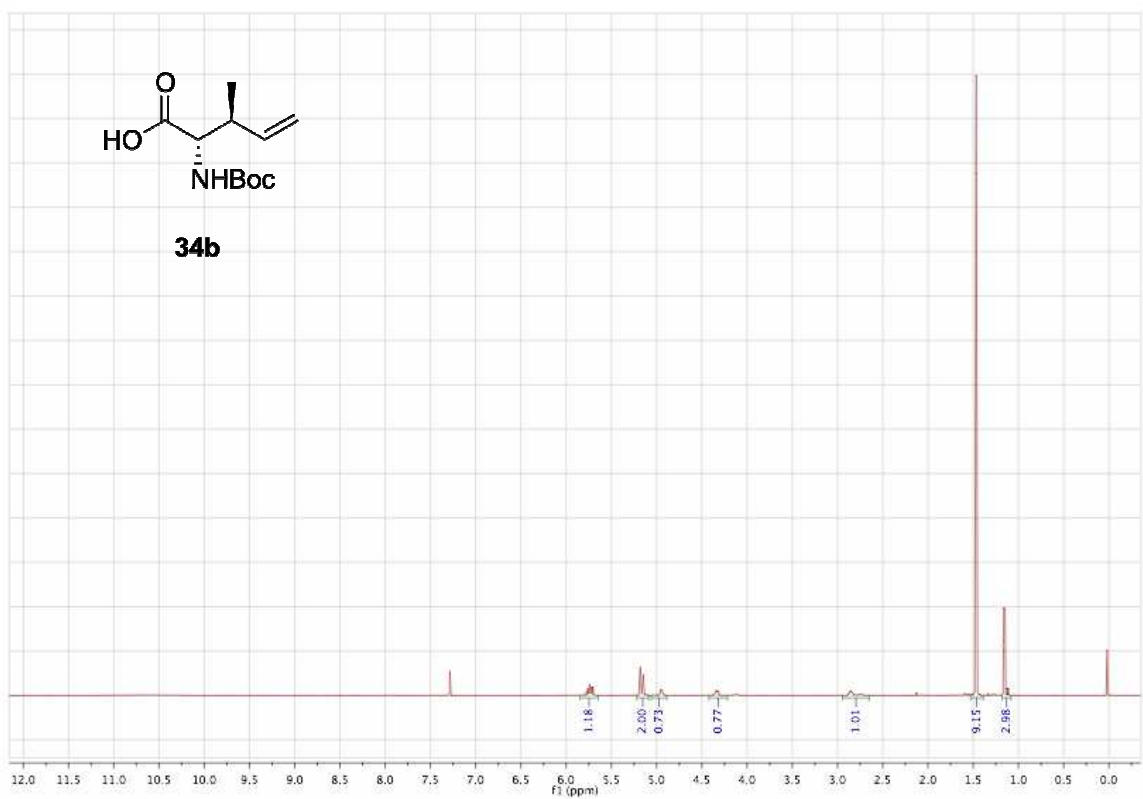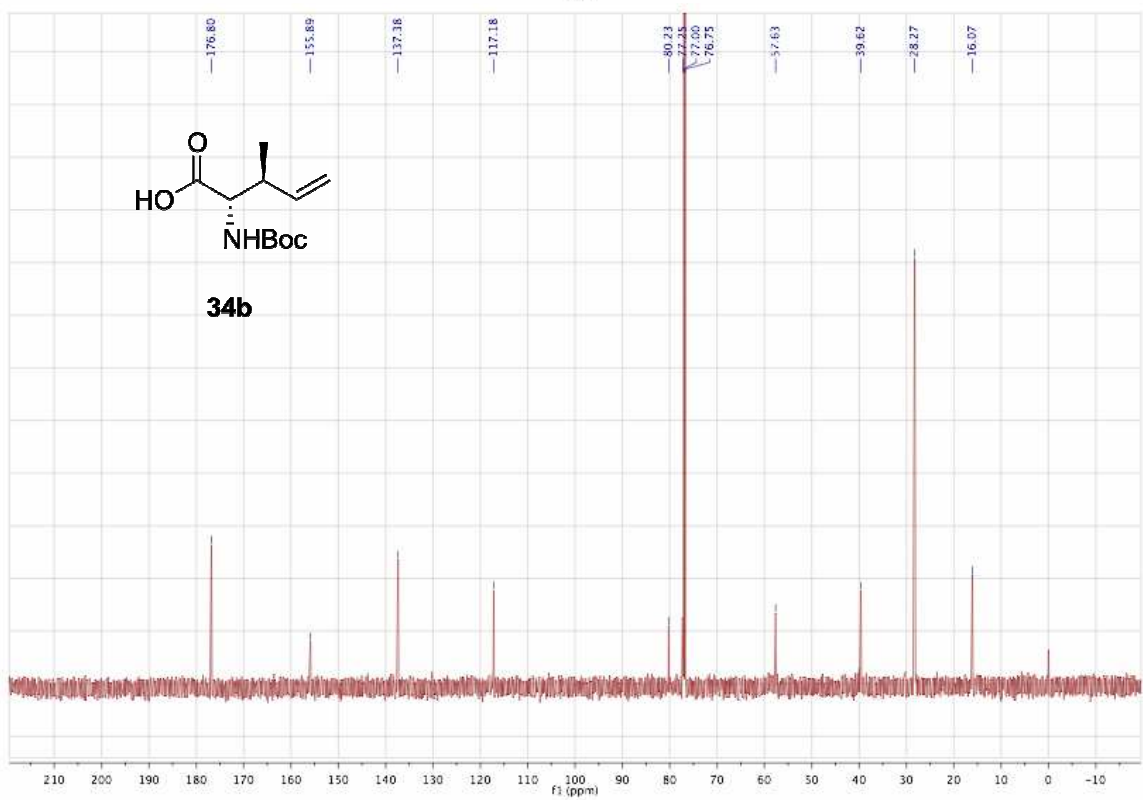

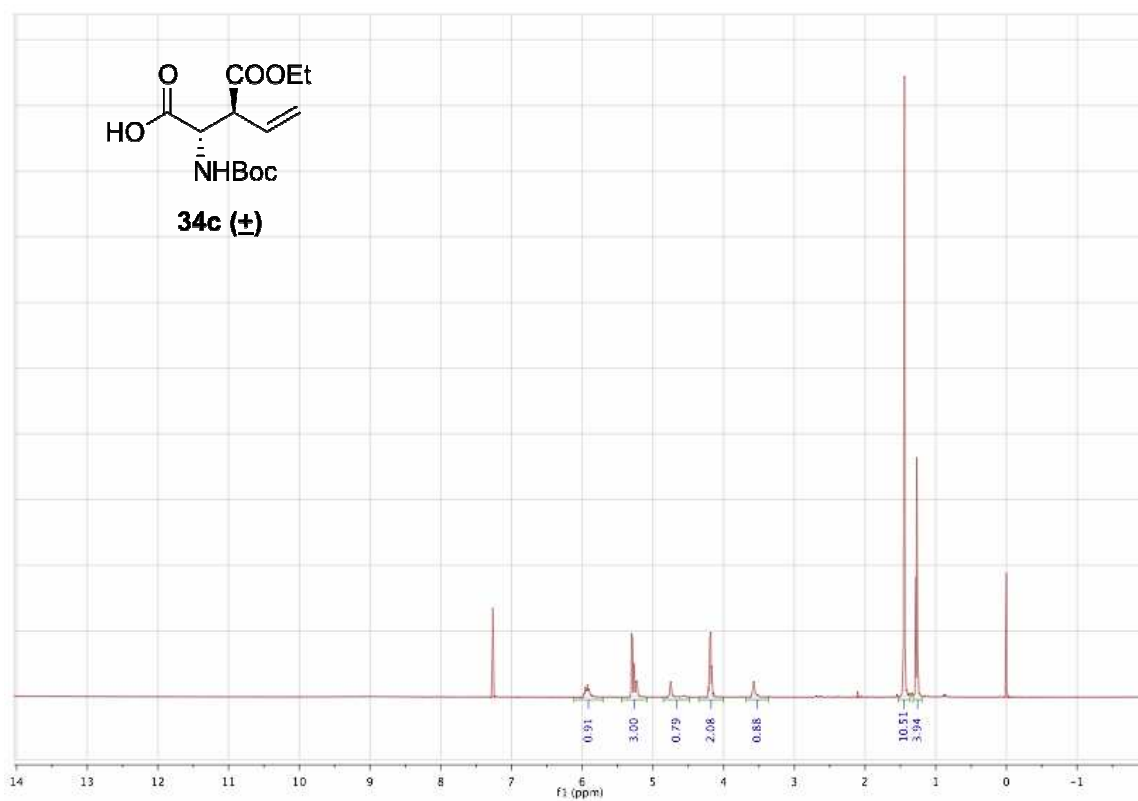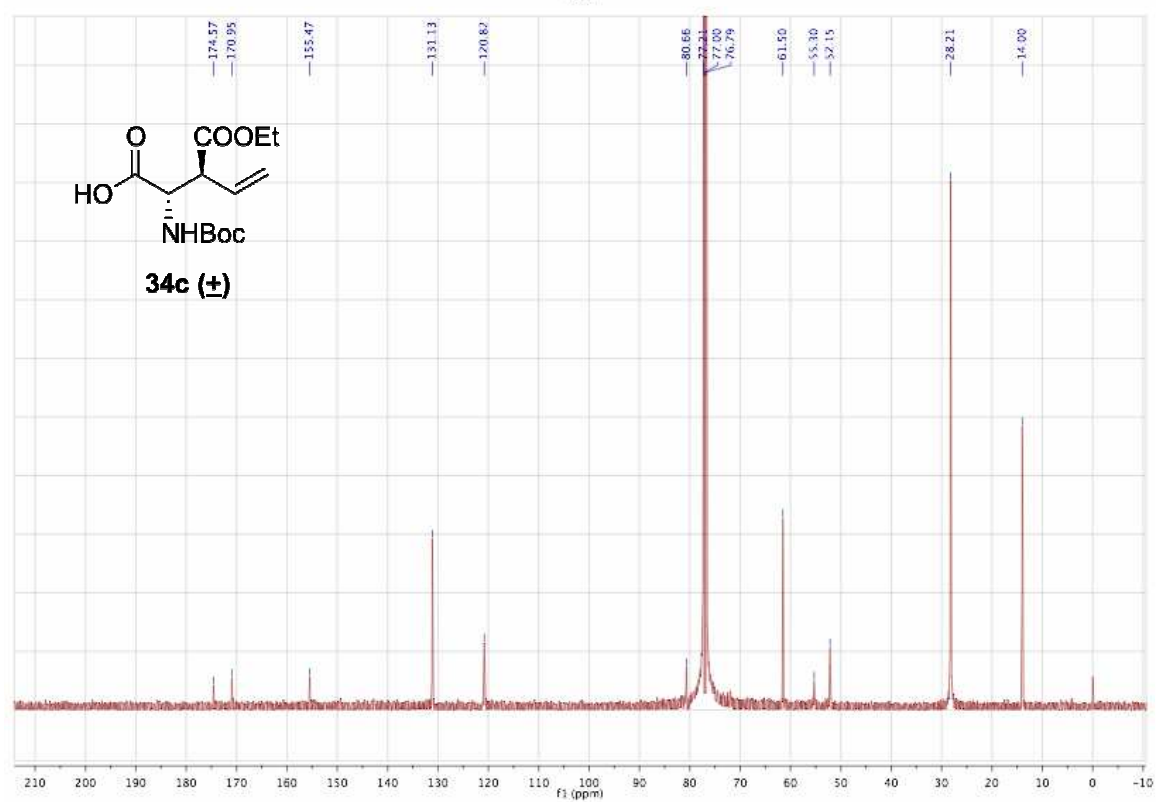

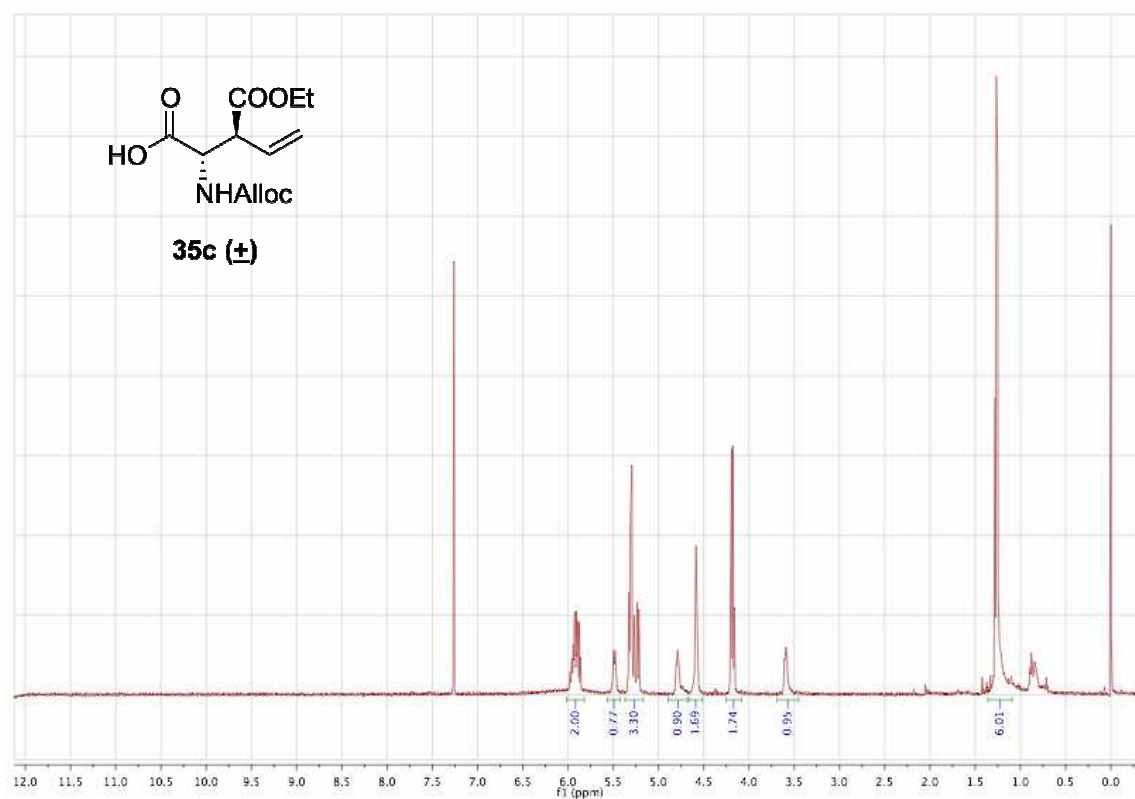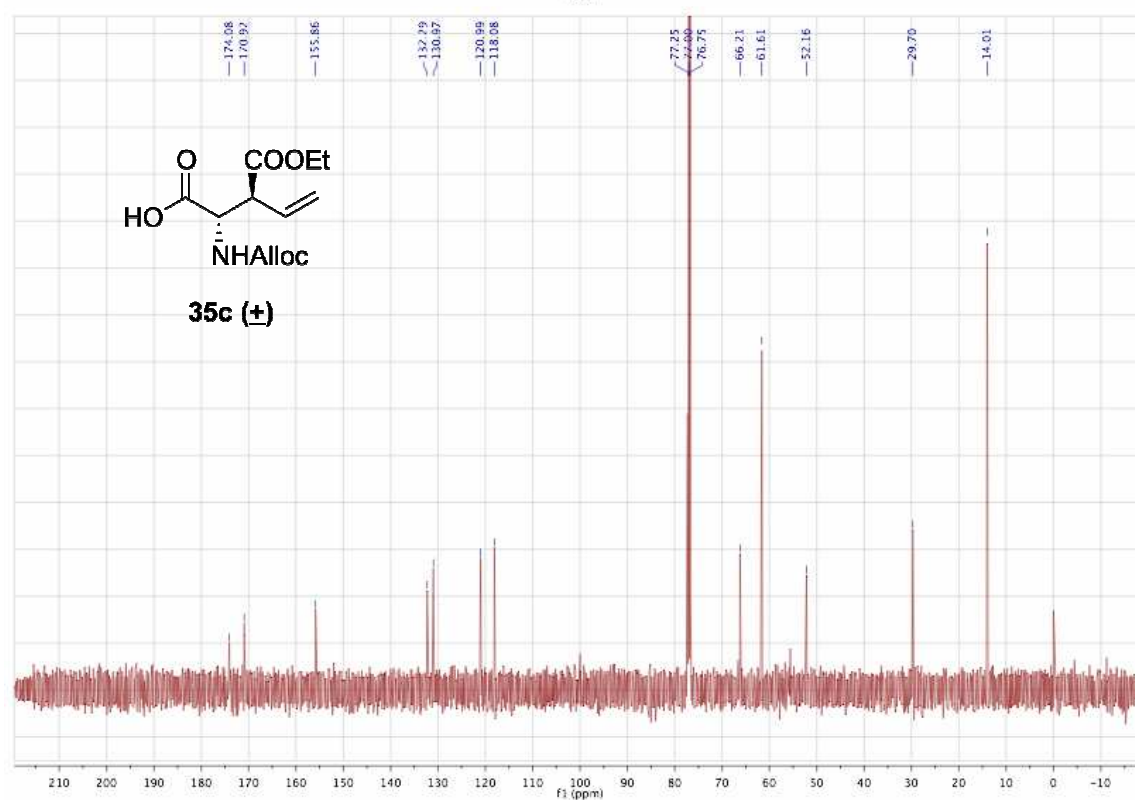

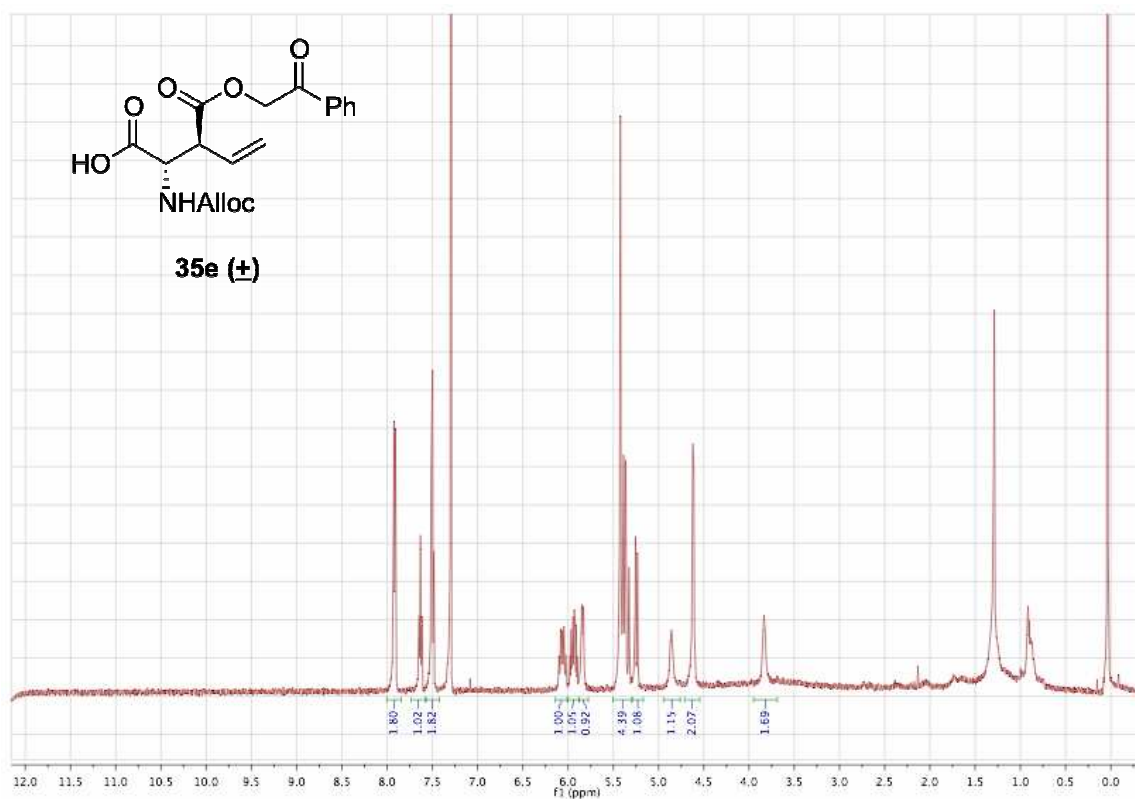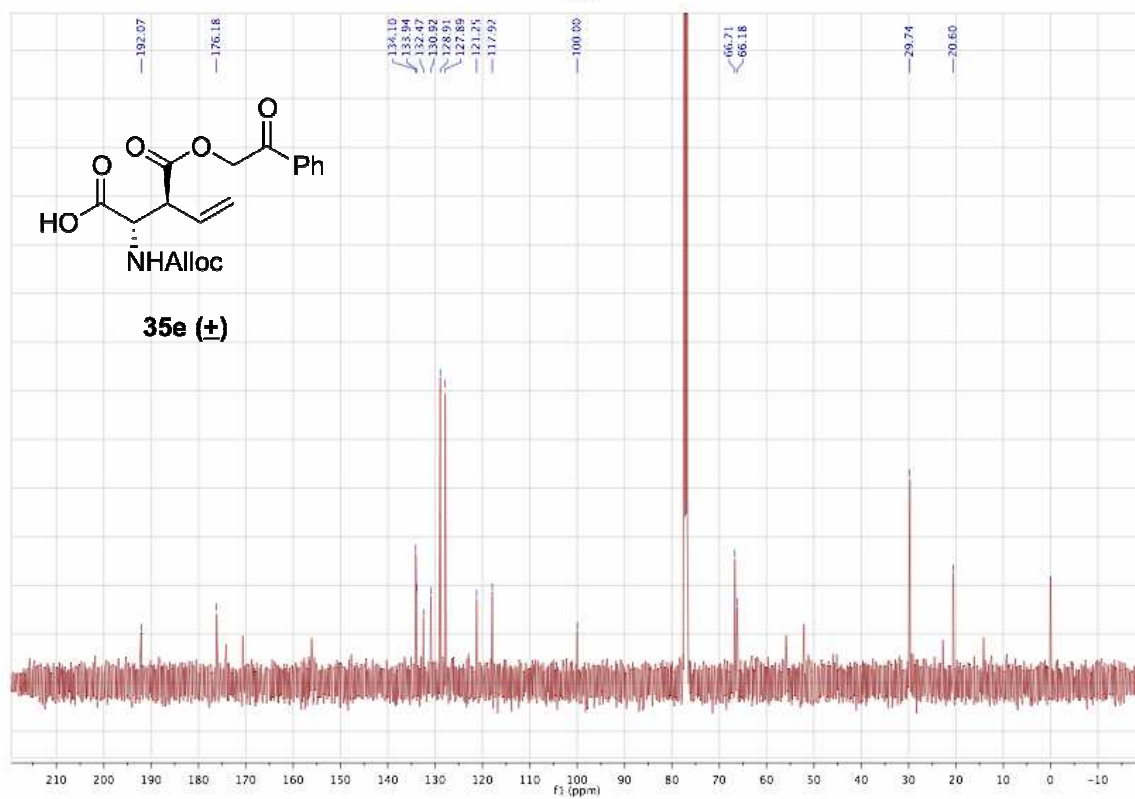



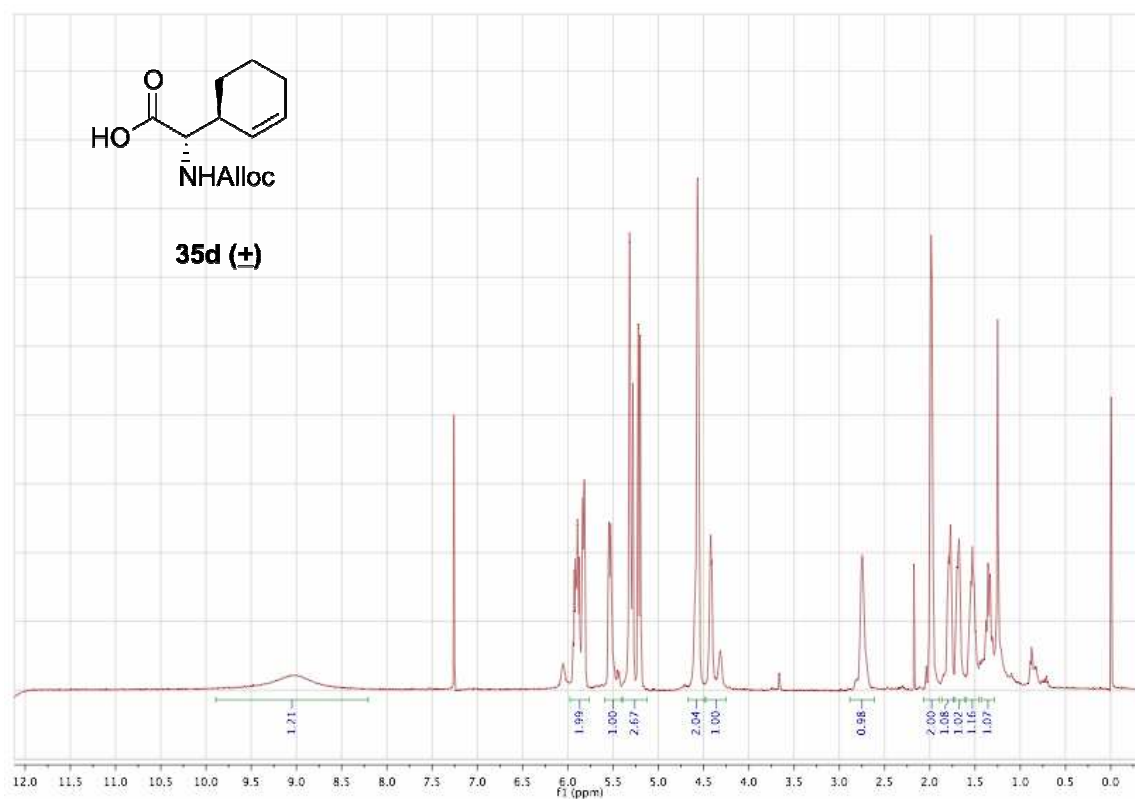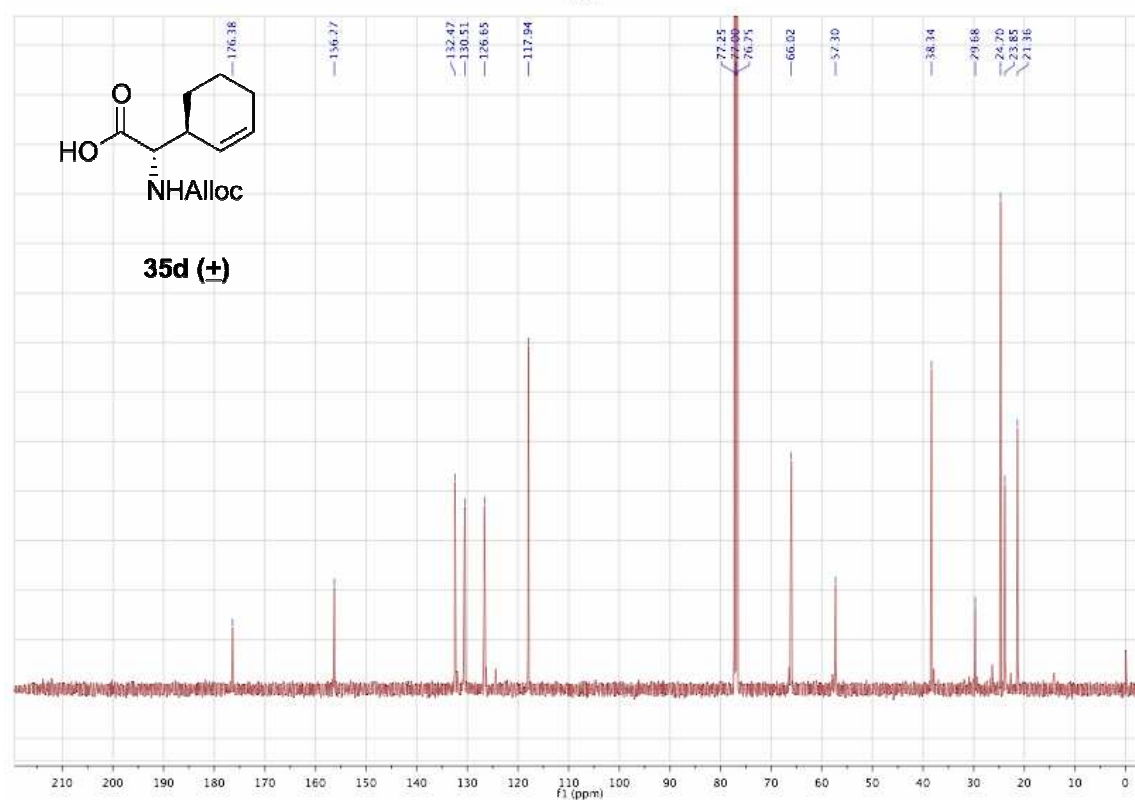

Supplement: Supplementary file 1 [file 4196479]
